# Supplementary material
Source: PubMed Central journal article supplement (PMC3035934)

## Online Data Supplement

### GENETIC ARCHITECTURE OF AMBULATORY BLOOD PRESSURE IN THE GENERAL POPULATION – INSIGHTS FROM CARDIOVASCULAR GENE-CENTRIC ARRAY

Maciej Tomaszewski <sup>1,2</sup>, Radoslaw Debiec <sup>1</sup>, Peter S Braund <sup>1</sup>, Christopher P Nelson <sup>1</sup>, Robert Hardwick <sup>3</sup>, Paraskevi Christofidou <sup>1</sup>, Matthew Denniff <sup>1</sup>, Veryan Codd <sup>1</sup>, Suzanne Rafelt <sup>1</sup>, Pim van der Harst <sup>1,4</sup>, Dawn Waterworth <sup>5</sup>, Kijoung Song <sup>5</sup>, Peter Vollenweider <sup>6</sup>, Gerard Waeber <sup>6</sup>, Ewa Zukowska-Szzechowska <sup>7</sup>, Paul R Burton <sup>2,8</sup>, Vincent Mooser <sup>5</sup>, Fadi J Charchar <sup>9</sup>, John R Thompson <sup>8</sup>, Martin D Tobin <sup>8</sup>, Nilesh J Samani <sup>1,2</sup>

<sup>1</sup> Department of Cardiovascular Sciences, University of Leicester, Leicester, UK, <sup>2</sup> Leicester NIHR Biomedical Research Unit in Cardiovascular Disease, Glenfield Hospital, Leicester, UK, <sup>3</sup> Department of Genetics, University of Leicester, Leicester, UK, <sup>4</sup> University Medical Center Groningen, University of Groningen, Groningen, The Netherlands, <sup>5</sup> GlaxoSmithKline, Pennsylvania, USA, <sup>6</sup> Department of Medicine, Centre Hospitalier Universitaire Vaudois, Lausanne, Switzerland, <sup>7</sup> Department of Internal Medicine, Diabetology, and Nephrology, Medical University of Silesia, Zabrze, Poland, <sup>8</sup> Department of Health Sciences, University of Leicester, Leicester, UK, <sup>9</sup> School of Science and Engineering, University of Ballarat, Ballarat, Australia

## **Illumina HumanCVD BeadChip**

A detailed list of the loci on the 50K IBC array (1) is available at <http://bmic.upenn.edu/cvdsnp/>. Genes and loci on this array were prioritized in three groups: [1] genes and loci with a high likelihood of functional significance (well-established contributors to vascular disease, genes implicated in genome-wide association studies and those with previous evidence of association) were captured with an  $r^2 \geq 0.8$  for HapMap SNPs with minor allele frequency (MAF)  $> 0.02$  (Tier 1), [2] loci of potential relevance to cardiovascular disease (or large loci that required a high number of tags) were covered with  $r^2 \geq 0.5$  for MAF  $> 0.05$  (Tier 2), [3] genes of lower interest to the IBC consortium investigators were represented only by non-synonymous and known functional variants with MAF  $> 0.01$  (Tier 3).

## **Extended information on CoLaus Study and Silesian Cardiovascular Study (SCS)**

Both studies recruited subjects of white European ancestry (CoLaus – 6188 unrelated subjects, SCS - 703 subjects from 213 families and 435 unrelated individuals). The CoLaus cohort was recruited from the general population of Lausanne, Switzerland (2). The Silesian Cardiovascular Study was conducted in 3 reference centres in the south of Poland and is enriched in patients with high cardiovascular risk (defined as coronary artery disease, hypertension, multiple cardiovascular risk factors or combinations of the above) (3). In both cohorts subjects were phenotyped for basic demographic and anthropometric parameters and clinic BP was measured three times in a sitting position using appropriately sized cuff and an oscillometric method according to the guidelines of European Society of Hypertension (4). For the purpose of this analysis, only biologically unrelated subjects (all CoLaus participants and 807 individuals from SCS) were selected. Full genetic and phenotypic information was available for 5356 and 753 biologically unrelated subjects from CoLaus and SCS, respectively.

## **Extended description of the statistical analysis**

Heritability of BP was estimated using an algorithm implemented in Sequential Oligogenic Linkage Analysis Routines (SOLAR v2.0) software (5). Total phenotypic variance of BP was partitioned into genetic and environmental components. The genetic component was further divided into polygenic additive effect - narrow sense heritability (explained by the regression slope) and the non-additive effect of alleles (the source of deviation from the slope – dominant effect). The model also estimated effects of known demographic covariates (age, age<sup>2</sup> and sex). The estimates were then modelled to best fit the observed data using maximum likelihood approach and genetic component tested against null hypothesis assuming heritable component equal to 0.

The  $\chi^2$  test was used to examine whether distributions of genotypes for each SNP on the 50K IBC array were concordant with Hardy-Weinberg equilibrium in the parental generation of the GRAPHIC Study. SNPs which passed this and additional filters (see Online Data Supplement) were examined for their associations with BP under an additive model of inheritance using generalized estimating equations (GEE) with exchangeable correlation structure to account for familial correlations and with adjustment for age, age<sup>2</sup> and sex. Association analysis of top SNPs in the GRAPHIC Study with clinic BP in the CoLaus and SCS cohorts was based on age, age<sup>2</sup> and sex adjusted linear regression models fitted in PLINK <http://pngu.mgh.harvard.edu/purcell/plink/> (6) under additive model of inheritance. BP values of subjects on antihypertensive treatment in all cohorts were adjusted for BP-lowering effect of therapy using a semi-parametric algorithm in GRAPHIC and SCS (7-8) or adding a constant of 15 mmHg (to SBP) and 10 mmHg (to DBP) in CoLaus (9). Genetic effects are shown as  $\beta$ -coefficients ( $\beta$ ) per each extra minor allele copy of a SNP with the respective standard error (SE).

The semi-parametric algorithm used to adjust for effects of antihypertensive medication in the GRAPHIC and SCS is essentially based on the approach described earlier by Levy (7) and Tobin (8). In brief, this method is based on estimation of the residuals for treatment adjusted BPs from regression models conditioned on the distribution of untreated residuals of at least equal (or greater) magnitude (7). Based on this non-parametric algorithm treatment adjusted BP is the sum

of measured BP plus the difference between the adjusted residual and the initial residual (7). No adjustments are made to BP values from subjects who are not treated with antihypertensive medication. Genetic effects are shown as  $\beta$ -coefficients per each extra minor allele copy of a SNP with the respective standard error (SE).

Two sensitivity analyses [(i) no treatment correction, (ii) exclusion of subjects on antihypertensive treatment] were undertaken to examine if antihypertensive therapy had any impact on the observed associations.

To correct for multiple testing in the GRAPHIC Study for each association with the two principal phenotypes (mean 24-hour SBP and DBP) we calculated q-values based on the method proposed by Storey and Tibshirani (10) and available in the QVALUE software (<http://genome.org/qvalue/>). The q-value of a test measures the proportion of false positives (false positive discovery rate) when this test is considered as significant. Q-value thresholds of 0.05 and 0.25 were selected to identify the findings that represent significant and suggestive associations, respectively.

Fixed-effect meta-analysis of SNPs on clinic BP in the GRAPHIC, CoLaus and SCS studies was conducted under additive model of inheritance using inverse variance weighted averages of  $\beta$ -coefficients and SEs in METAL (<http://www.sph.umich.edu/csg/abecasis/metal/index.html>). The inverse variance weighted fixed effects meta-analysis combines effects size estimates ( $\beta$ -coefficients) along with respective standard errors across studies by assigning each study a weight inversely proportional to the variance of its estimate (<http://www.sph.umich.edu/csg/abecasis/metal/>). The between-study heterogeneity was evaluated using  $\chi^2$  test.

Two-tail Fisher's exact test was used to analyse the distributions of rare, exonic and non-synonymous variants across different strata of associations with mean 24-hour mean SBP and DBP in the GRAPHIC Study.

The power estimates of the GRAPHIC Study to detect both nominal ( $P < 0.05$ ) and Bonferroni adjusted (33577 tests) effects of various sizes for mean 24-hour SBP and DBP across a range of different minor allele frequencies were derived using the average SE observed at each allele frequency and constructed in STATA.

### **Extended description of the bioinformatic analysis**

All SNPs on the 50K IBC array were annotated to specific loci using resources available in public domain including information on design of the array at <http://bmic.upenn.edu/cvdsnp/>, NCBI (Built 36.3) and SNP Function Portal - web-based application for analysis of human genetic variants (11).

The most significant candidate region implicated in the association analysis (5' flanking sequence of 5,10-methylenetetrahydrofolate reductase (NADPH) gene /MTHFR/ and chloride channel 6 gene /CLCN6/) was aligned against syntenic rodent BP quantitative trait loci (QTLs) in UCSC Genome Browser (<http://genome.ucsc.edu/>) based on the information extracted from Rat Genome Database – RGD (<http://rgd.mcw.edu/>) and Mouse Genome Informatics (MGI) resource (<http://www.informatics.jax.org/>). CpG islands (definition based on Gardiner-Garden and Frommer criteria) (12) were identified and visualised using the UCSC Genome Browser. Conservation score statistics (PhastCons estimate) in the placental mammals (17 species plus human) was calculated based on a probabilistic two-state phylogenetic hidden Markov model (13). Functional potential of the candidate regions was examined using evolutionary and sequence pattern extraction through reduced representations (ESPERR) method for identification of non-neutral *cis*-regulatory DNA elements (14).

To examine in more detail associations between mean 24-hour BP and genes previously linked to SBP and DBP we identified such genes using the Gene Ontology Annotation Database (GOA) (<http://www.ebi.ac.uk/GOA/downloads.html>). The details of this GOA-based strategy are shown in **Table S1**.

Identification of processes associated with mean 24-hour SBP and DBP was conducted using Gene set-based analysis of polymorphisms (GeSBAP) web interface (15). GeSBAP implements a

pathwayomic paradigm (examination of blocks of functionally related genes rather than single molecules) in relation to data from large scale SNP-based genotyping experiments. The major computational algorithm of this programme screens for gene sets enrichments associated with the ranked value of statistical measure ( $-\log$  P-value from the association analysis) and corrects for multiple testing by integrated false discovery rate computation (15). Gene ontology (GO) database was used as a reference repository of functionally annotated biological processes.

### **50K IBC array genotyping in GRAPHIC: Reasons for exclusion of SNPs prior to analysis**

Of 49094 genotyped SNPs, 1775 were excluded because they belonged to admixture and ancestry informative control markers. Duplicate SNPs and those identified as copy number variants ( $n=106$ ) were also removed. Additional filters resulted in exclusion of 13636 further SNPs because of low ( $<0.01$ ) MAF ( $n=12443$ ), location on sex chromosomes ( $n=638$ ), low ( $<90\%$ ) genotyping call rate ( $n=424$ ),  $>10$  Mendelian errors suggestive of poor genotyping quality (which was possible to check because of the family-based structure of GRAPHIC) ( $n=20$ ), Hardy-Weinberg equilibrium violation ( $p<0.0001$ ) ( $n=107$ ), and lack of unambiguous rs identification number ( $n=4$ ).

### **rs13306560, rs17367504 and rs11801879 – conditional analysis**

To examine inter-relationships between the associations with mean 24-hour DBP for rs13306560 and rs17367504 we undertook a conditional analysis. When genotypes at rs13306560 were added as a covariate to the regression analysis the association between mean 24-hour DBP and rs17367504 was largely abolished ( $P=0.0519$ ). On the other hand, the association of rs13306560 remained highly significant when conditioned on rs17367504 ( $P=9.9\times 10^{-5}$ ). This indicated an inter-relationship despite the low  $r^2$  between the two SNPs. Further examination showed that D' coefficient between the two SNPs was high (0.99) and that there was almost entire concordance of genotypes between carriers of the minor allele for rs13306560 and a proportion of individuals carrying the minor allele for rs17367504. This suggests that the association with mean 24-hour DBP at rs17367504 is largely driven by its relationship with rs13306560. Simulation studies assuming a causal SNP with a MAF of 5% and a marker SNP with a MAF of 16% and an  $r^2$  of 0.25, with similar P-values to those seen for rs13306560 and rs17367504 (for their individual associations), confirmed that in conditional analyses the P-values for each changed exactly in the way that was observed in our study. Further conditional analysis indicated that, similar to rs17367504, the association of rs11801879 with mean 24-hour DBP was driven by its linkage disequilibrium with rs13306560 ( $P=0.0482$  when adjusted for 13306560).

### **References:**

1. Keating BJ, Tischfield S, Murray SS, Bhangale T, Price TS, Glessner JT, Galver L, Barrett JC, Grant SF, Farlow DN, Chandrupatla HR, Hansen M, Ajmal S, Papanicolaou GJ, Guo Y, Li M, Derohannessian S, de Bakker PI, Bailey SD, Montpetit A, Edmondson AC, Taylor K, Gai X, Wang SS, Fornage M, Shaikh T, Groop L, Boehnke M, Hall AS, Hattersley AT, Frackelton E, Patterson N, Chiang CW, Kim CE, Fabsitz RR, Ouwehand W, Price AL, Munroe P, Caulfield M, Drake T, Boerwinkle E, Reich D, Whitehead AS, Cappola TP, Samani NJ, Lusk AJ, Schadt E, Wilson JG, Koenig W, McCarthy MI, Kathiresan S, Gabriel SB, Hakonarson H, Anand SS, Reilly M, Engert JC, Nickerson DA, Rader DJ, Hirschhorn JN, Fitzgerald GA. Concept, design and implementation of a cardiovascular gene-centric 50 k SNP array for large-scale genomic association studies. *PLoS One*. 2008;3:e3583.
2. Firmann M, Mayor V, Vidal PM, Bochud M, Pecoud A, Hayoz D, Paccaud F, Preisig M, Song KS, Yuan X, Danoff TM, Stirnadel HA, Waterworth D, Mooser V, Waeber G, Vollenweider P. The CoLaus study: A population-based study to investigate the epidemiology and genetic determinants of cardiovascular risk factors and metabolic syndrome. *BMC Cardiovasc Disord*. 2008;8:6.

3. Tomaszewski M, Charchar FJ, Barnes T, Gawron-Kiszka M, Sedkowska A, Podolecka E, Kowalczyk J, Rathbone W, Kalarus Z, Grzeszczak W, Goodall AH, Samani NJ, Zukowska-Szczechowska E. A common variant in low-density lipoprotein receptor-related protein 6 gene (LRP6) is associated with LDL-cholesterol. *Arterioscler Thromb Vasc Biol.* 2009;29:1316-1321.
4. Mancia G, De Backer G, Dominiczak A, Cifkova R, Fagard R, Germano G, Grassi G, Heagerty AM, Kjeldsen SE, Laurent S, Narkiewicz K, Ruilope L, Rynkiewicz A, Schmieder RE, Boudier HA, Zanchetti A, Vahanian A, Camm J, De Caterina R, Dean V, Dickstein K, Filippatos G, Funck-Brentano C, Hellemans I, Kristensen SD, McGregor K, Sechtem U, Silber S, Tendera M, Widimsky P, Zamorano JL, Erdine S, Kiowski W, Agabiti-Rosei E, Ambrosioni E, Lindholm LH, Viigimaa M, Adamopoulos S, Bertomeu V, Clement D, Farsang C, Gaita D, Lip G, Mallion JM, Manolis AJ, Nilsson PM, O'Brien E, Ponikowski P, Redon J, Ruschitzka F, Tamargo J, van Zwieten P, Waeber B, Williams B. 2007 guidelines for the management of arterial hypertension: The task force for the management of arterial hypertension of the European Society of Hypertension (ESH) and of the European Society of Cardiology (ESC). *J Hypertens.* 2007;25:1105-1187.
5. Almasy L, Blangero J. Multipoint quantitative trait linkage analysis in general pedigrees. *Am J Hum Genet.* 1998;62:1198-1211.
6. Purcell S, Neale B, Todd-Brown K, Thomas L, Ferreira MA, Bender D, Maller J, Sklar P, de Bakker PI, Daly MJ, Sham PC. PLINK: A tool set for whole-genome association and population-based linkage analyses. *Am J Hum Genet.* 2007;81:559-575.
7. Levy D, DeStefano AL, Larson MG, O'Donnell CJ, Lifton RP, Gavras H, Cupples LA, Myers RH. Evidence for a gene influencing blood pressure on chromosome 17. Genome scan linkage results for longitudinal blood pressure phenotypes in subjects from the Framingham Heart Study. *Hypertension.* 2000;36:477-483.
8. Tobin MD, Sheehan NA, Scurrah KJ, Burton PR. Adjusting for treatment effects in studies of quantitative traits: Antihypertensive therapy and systolic blood pressure. *Stat Med.* 2005;24:2911-35.
9. Newton-Cheh C, Johnson T, Gateva V, Tobin MD, Bochud M, Coin L, Najjar SS, Zhao JH, Heath SC, Eyheramendy S, Papadakis K, Voight BF, Scott LJ, Zhang F, Farrall M, Tanaka T, Wallace C, Chambers JC, Khaw KT, Nilsson P, van der Harst P, Polidoro S, Grobbee DE, Onland-Moret NC, Bots ML, Wain LV, Elliott KS, Teumer A, Luan J, Lucas G, Kuusisto J, Burton PR, Hadley D, McArdle WL, Wellcome Trust Case Control Consortium, Brown M, Dominiczak A, Newhouse SJ, Samani NJ, Webster J, Zeggini E, Beckmann JS, Bergmann S, Lim N, Song K, Vollenweider P, Waeber G, Waterworth DM, Yuan X, Groop L, Orholm-Melander M, Allione A, Di Gregorio A, Guarrera S, Panico S, Ricceri F, Romanazzi V, Sacerdote C, Vineis P, Barroso I, Sandhu MS, Luben RN, Crawford GJ, Jousilahti P, Perola M, Boehnke M, Bonnycastle LL, Collins FS, Jackson AU, Mohlke KL, Stringham HM, Valle TT, Willer CJ, Bergman RN, Morken MA, Doring A, Gieger C, Illig T, Meitinger T, Org E, Pfeufer A, Wichmann HE, Kathiresan S, Marrugat J, O'Donnell CJ, Schwartz SM, Siscovick DS, Subirana I, Freimer NB, Hartikainen AL, McCarthy MI, O'Reilly PF, Peltonen L, Pouta A, de Jong PE, Snieder H, van Gilst WH, Clarke R, Goel A, Hamsten A, Peden JF, Seedorf U, Syvanen AC, Tognoni G, Lakatta EG, Sanna S, Scheet P, Schlessinger D, Scuteri A, Dorr M, Ernst F, Felix SB, Homuth G, Lorbeer R, Reffelmann T, Rettig R, Volker U, Galan P, Gut IG, Hercberg S, Lathrop GM, Zelenika D, Deloukas P, Soranzo N, Williams FM, Zhai G, Salomaa V, Laakso M, Elosua R, Forouhi NG, Volzke H, Uitterwaal CS, van der Schouw YT, Numans ME, Matullo G, Navis G, Berglund G, Bingham SA, Kooner JS, Connell JM, Bandinelli S, Ferrucci L, Watkins H, Spector TD, Tuomilehto J, Altshuler D, Strachan DP, Laan M, Meneton P, Wareham NJ, Uda M, Jarvelin MR, Mooser V, Melander O, Loos RJ, Elliott P, Abecasis GR, Caulfield M, Munroe PB. Genome-wide association study identifies eight loci associated with blood pressure. *Nat Genet.* 2009;44:666-676.
10. Storey JD, Tibshirani R. Statistical significance for genomewide studies. *Proc Natl Acad Sci U S A.* 2003;100:9440-9445.

11. Wang P, Dai M, Xuan W, McEachin RC, Jackson AU, Scott LJ, Athey B, Watson SJ, Meng F. SNP function portal: A web database for exploring the function implication of SNP alleles. *Bioinformatics*. 2006;22:e523-529.
12. Gardiner-Garden M, Frommer M. CpG islands in vertebrate genomes. *J Mol Biol*. 1987;196:261-282.
13. Siepel A, Bejerano G, Pedersen JS, Hinrichs AS, Hou M, Rosenbloom K, Clawson H, Spieth J, Hillier LW, Richards S, Weinstock GM, Wilson RK, Gibbs RA, Kent WJ, Miller W, Haussler D. Evolutionarily conserved elements in vertebrate, insect, worm, and yeast genomes. *Genome Res*. 2005;15:1034-1050.
14. Taylor J, Tyekucheva S, King DC, Hardison RC, Miller W, Chiaromonte F. ESPERR: Learning strong and weak signals in genomic sequence alignments to identify functional elements. *Genome Res*. 2006;16:1596-1604.
15. Medina I, Montaner D, Bonifaci N, Pujana MA, Carbonell J, Tarraga J, Al-Shahrour F, Dopazo J. Gene set-based analysis of polymorphisms: Finding pathways or biological processes associated to traits in genome-wide association studies. *Nucleic Acids Res*. 2009;37:W340-344.

**Table S1.** Bioinformatics strategy to identify most relevant blood pressure genes on Illumina HumanCVD BeadChip.

| Stage                                                                                                                                                                                                                                  | Outcome          |
|----------------------------------------------------------------------------------------------------------------------------------------------------------------------------------------------------------------------------------------|------------------|
| Identification of GO categories linked to “blood” and/or “pressure” terms in GOA database                                                                                                                                              | 336 GO processes |
| Identification of GO categories directly related to blood pressure and/or hypertension (based on contribution to blood pressure regulation and/or relevance to antihypertensive treatment) - independent assessment of 2 investigators | 113 GO processes |
| Identification of genes with annotation to at least one GO category with the highest relevance to blood pressure regulation/hypertension                                                                                               | 129 genes        |
| Identification of genes annotated to at least one GO category with the highest relevance to blood pressure regulation/hypertension and present on Illumina HumanCVD BeadChip (after genotyping and quality control filters)            | 110 genes        |
| Removal of genes with insufficient tagging – (Tier 3 of prioritizing)                                                                                                                                                                  | 105 genes        |

GO – Gene ontology; GOA - Gene Ontology Annotation Database, Tier 3 of prioritizing - genes of lower interest to the IBC consortium investigators represented only by non-synonymous and known functional variants with minor allele frequency >0.01

**Table S2.** Characteristics of the CoLaus cohort and Silesian Cardiovascular Study (SCS).

| Variable                             | CoLaus                | SCS                 |
|--------------------------------------|-----------------------|---------------------|
| n                                    | 6188                  | 807                 |
| M/F (%)                              | 2937/3251 (47.5/52.5) | 465/342 (57.6/42.4) |
| Age (years)                          | 53.1±10.8             | 55.3±11.6           |
| Body mass index (kg/m <sup>2</sup> ) | 25.8±4.6              | 27.5±4.2            |
| Clinic SBP (mmHg)                    | 128.0±18.0            | 131.5±19.1          |
| Clinic DBP (mmHg)                    | 79.0±11.0             | 75.1±11.1           |
| Antihypertensive treatment (%)       | 1131 (18.3)           | 478 (59.2)          |

Data are means and standard deviations or counts and percentages, M-men, F-women



**Table S3.** SNPs showing suggestive associations with mean 24-hour SBP in the GRAPHIC Study.

| Ch | Locus | SNP       | Location (bp) | Minor (coded)/major allele | Minor allele frequency - parents | HWE - parents | $\beta$ -coefficient (SE) | P-value              | q-value |
|----|-------|-----------|---------------|----------------------------|----------------------------------|---------------|---------------------------|----------------------|---------|
| 17 | SPHK1 | rs9892909 | 71884670      | T/C                        | 0.0977                           | 1             | -2.28 (0.50)              | $5.3 \times 10^{-6}$ | 0.0815  |
| 11 | KCNQ1 | rs2283210 | 2704481       | G/C                        | 0.0225                           | 0.4039        | -4.22 (0.97)              | $1.5 \times 10^{-5}$ | 0.1095  |
| 2  | PDE1A | rs2623410 | 182880609     | A/G                        | 0.0122                           | 1             | -4.63 (1.13)              | $4.3 \times 10^{-5}$ | 0.2309  |
| 5  | THBS4 | rs443095  | 79398306      | T/C                        | 0.0176                           | 0.2688        | -4.08 (1.00)              | $5.0 \times 10^{-5}$ | 0.2309  |

SNP – single nucleotide polymorphism; Ch – chromosome; bp – base pair; HWE – statistical significance of Hardy-Weinberg equilibrium test;  $\beta$ -coefficient – estimated quantitative effect of each SNP minor allele copy on mean 24-hour SBP (adjusted for age, age<sup>2</sup>, sex and antihypertensive medication); a negative  $\beta$  indicates lower BP in carriers of the minor allele; SE – standard error; P-value – statistical significance of association; q-value – false positive discovery rate

**Table S4.** SNPs showing significant or suggestive associations with mean 24-hour BP - analysis of association with clinic BP in the GRAPHIC Study.

| Ch | Locus | SNP        | Mean 24-hour SBP          |                                        | Mean 24-hour DBP          |                      | Clinic SBP                |                      | Clinic DBP                |                      |
|----|-------|------------|---------------------------|----------------------------------------|---------------------------|----------------------|---------------------------|----------------------|---------------------------|----------------------|
|    |       |            | $\beta$ -coefficient (SE) | P-value                                | $\beta$ -coefficient (SE) | P-value              | $\beta$ -coefficient (SE) | P-value              | $\beta$ -coefficient (SE) | P-value              |
| 1  | USH2A | rs2797221  | <b>-3.92 (0.79)</b>       | <b><math>8.6 \times 10^{-7}</math></b> | <b>-2.44 (0.98)</b>       | <b>0.0131</b>        | -4.20 (1.63)              | 0.0100               | -4.13 (1.39)              | 0.0031               |
| 17 | SPHK1 | rs9892909  | -2.28 (0.50)              | $5.3 \times 10^{-6}$                   | -1.25 (0.38)              | 0.0009               | -3.07 (0.83)              | 0.0002               | -1.91 (0.53)              | 0.0004               |
| 11 | KCNQ1 | rs2283210  | -4.22 (0.97)              | $1.5 \times 10^{-5}$                   | -2.55 (0.73)              | 0.0005               | -5.63 (1.42)              | $7.2 \times 10^{-5}$ | -2.24 (1.20)              | 0.0616               |
| 2  | PDE1A | rs2623410  | -4.63 (1.13)              | $4.3 \times 10^{-5}$                   | -2.10 (0.98)              | 0.0329               | -8.02 (1.74)              | $4.1 \times 10^{-6}$ | -2.00 (1.00)              | 0.0459               |
| 5  | THBS4 | rs443095   | -4.08 (1.00)              | $5.0 \times 10^{-5}$                   | -1.37 (0.64)              | 0.0333               | -3.89 (1.64)              | 0.0178               | -1.21 (1.09)              | 0.2663               |
| 1  | PTGS2 | rs4648310  | -2.41 (0.84)              | 0.0039                                 | -2.26 (0.50)              | $5.9 \times 10^{-6}$ | -2.90 (1.44)              | 0.0433               | -2.64 (1.04)              | 0.0108               |
| 1  | NPPB  | rs11801879 | -2.06 (0.58)              | 0.0004                                 | -1.80 (0.40)              | $7.7 \times 10^{-6}$ | -1.93 (0.94)              | 0.0398               | -1.11 (0.59)              | 0.0582               |
| 1  | MTHFR | rs17037388 | -1.62 (0.45)              | 0.0004                                 | -1.26 (0.28)              | $9.1 \times 10^{-6}$ | -2.11 (0.70)              | 0.0027               | -2.03 (0.43)              | $3.0 \times 10^{-6}$ |
| 1  | MTHFR | rs17037390 | -1.56 (0.46)              | 0.0006                                 | -1.25 (0.28)              | $1.2 \times 10^{-5}$ | -2.11 (0.71)              | 0.0028               | -2.03 (0.44)              | $3.1 \times 10^{-6}$ |
| 1  | MTHFR | rs17367504 | -1.67 (0.46)              | 0.0003                                 | -1.25 (0.29)              | $1.8 \times 10^{-5}$ | -2.24 (0.72)              | 0.0019               | -2.03 (0.44)              | $3.6 \times 10^{-6}$ |
| 1  | MTHFR | rs13306561 | -1.57 (0.46)              | 0.0006                                 | -1.20 (0.29)              | $3.0 \times 10^{-5}$ | -2.13 (0.72)              | 0.0030               | -1.94 (0.43)              | $7.9 \times 10^{-6}$ |
| 17 | NLRP1 | rs925596   | 1.75 (0.55)               | 0.0014                                 | 1.44 (0.36)               | $5.2 \times 10^{-5}$ | 2.34 (0.86)               | 0.0067               | 1.56 (0.50)               | 0.0020               |
| 8  | CPA6  | rs6993502  | -2.83 (1.12)              | 0.0110                                 | -2.61 (0.64)              | $5.2 \times 10^{-5}$ | -5.11 (1.77)              | 0.0039               | -3.84 (1.18)              | 0.0012               |
| 2  | STAT1 | rs2280232  | 0.92 (0.40)               | 0.0204                                 | 1.11 (0.28)               | $5.7 \times 10^{-5}$ | -0.06 (0.65)              | 0.9216               | 0.40 (0.40)               | 0.3289               |
| 6  | AGER  | rs1035798  | 1.27 (0.39)               | 0.0013                                 | 1.10 (0.28)               | $6.6 \times 10^{-5}$ | 1.88 (0.63)               | 0.0030               | 0.66 (0.39)               | 0.0851               |
| 3  | CISH  | rs873985   | -1.36 (0.48)              | 0.0041                                 | -1.27 (0.32)              | $6.7 \times 10^{-5}$ | -2.11 (0.73)              | 0.0038               | -1.21 (0.46)              | 0.0084               |
| 17 | NOG   | rs12603626 | -1.04 (0.36)              | 0.0037                                 | -0.95 (0.24)              | $6.8 \times 10^{-5}$ | -0.71 (0.55)              | 0.1949               | -0.45 (0.32)              | 0.1648               |

SNP – single nucleotide polymorphism, Ch – chromosome,  $\beta$ -coefficient – estimated quantitative effect of each SNP minor allele copy on BP (adjusted for age, age<sup>2</sup>, sex and antihypertensive medication); a negative  $\beta$  indicates lower BP in carriers of the minor allele, SE – standard error, P-value – statistical significance of association, bold - data presented in Table 2, italic - data presented in Supplementary Tables 3 and 5

**Table S5.** SNPs showing suggestive associations with mean 24-hour DBP in the GRAPHIC Study.

| Ch | Locus | SNP        | Location (bp) | Minor (coded) /major allele | Minor allele frequency – parents | HWE - parents | β-coefficient (SE) | P-value              | q-value |
|----|-------|------------|---------------|-----------------------------|----------------------------------|---------------|--------------------|----------------------|---------|
| 1  | PTGS2 | rs4648310  | 184907148     | G/A                         | 0.0273                           | 0.0363        | -2.26 (0.50)       | 5.9x10 <sup>-6</sup> | 0.0815  |
| 1  | NPPB  | rs11801879 | 11851406      | C/T                         | 0.0898                           | 0.5639        | -1.80 (0.40)       | 7.7x10 <sup>-6</sup> | 0.0856  |
| 1  | MTHFR | rs17037388 | 11780623      | G/A                         | 0.1680                           | 0.5770        | -1.26 (0.28)       | 9.1x10 <sup>-6</sup> | 0.0864  |
| 1  | MTHFR | rs17037390 | 11783430      | A/G                         | 0.1685                           | 0.5769        | -1.25 (0.28)       | 1.2x10 <sup>-5</sup> | 0.0959  |
| 1  | MTHFR | rs17367504 | 11785365      | G/A                         | 0.1650                           | 0.7344        | -1.25 (0.29)       | 1.8x10 <sup>-5</sup> | 0.1166  |
| 1  | MTHFR | rs13306561 | 11788391      | C/T                         | 0.1689                           | 0.9113        | -1.20 (0.29)       | 3.0x10 <sup>-5</sup> | 0.1819  |
| 17 | NLRP1 | rs925596   | 5428823       | G/A                         | 0.1129                           | 0.2117        | 1.44 (0.36)        | 5.2x10 <sup>-5</sup> | 0.2309  |
| 8  | CPA6  | rs6993502  | 68740520      | G/A                         | 0.0220                           | 0.3899        | -2.61 (0.64)       | 5.2x10 <sup>-5</sup> | 0.2309  |
| 2  | STAT1 | rs2280232  | 191559011     | G/T                         | 0.2261                           | 1             | 1.11 (0.28)        | 5.7x10 <sup>-5</sup> | 0.2368  |
| 6  | AGER  | rs1035798  | 32259200      | T/C                         | 0.2314                           | 1             | 1.10 (0.28)        | 6.6x10 <sup>-5</sup> | 0.2382  |
| 3  | CISH  | rs873985   | 50626755      | G/A                         | 0.1514                           | 1             | -1.27 (0.32)       | 6.7x10 <sup>-5</sup> | 0.2382  |
| 17 | NOG   | rs12603626 | 52037330      | A/C                         | 0.3701                           | 0.4609        | -0.95 (0.24)       | 6.8x10 <sup>-5</sup> | 0.2382  |

SNP – single nucleotide polymorphism, Ch – chromosome, bp – base pair, HWE – statistical significance of Hardy-Weinberg equilibrium test, β-coefficient – estimated quantitative effect of each SNP minor allele copy on mean 24-hour DBP (adjusted for age, age<sup>2</sup>, sex and antihypertensive medication); a negative β indicates lower BP in carriers of the minor allele; SE – standard error, P-value – statistical significance of association, q-value – false positive discovery rate

**Table S6.** SNPs showing significant and suggestive associations with mean 24-hour SBP in the GRAPHIC Study – sensitivity analyses.

| Chr | Locus | SNP       | Location (bp) | Minor (coded)/major allele | MAF    | HWE    | Reference analysis                                    | Sensitivity analysis 1                                | Sensitivity analysis 2                                |
|-----|-------|-----------|---------------|----------------------------|--------|--------|-------------------------------------------------------|-------------------------------------------------------|-------------------------------------------------------|
| 1   | USH2A | rs2797221 | 213979265     | T/C                        | 0.0112 | 1      | $\beta=-3.92$ ,<br>SE=0.79,<br>P=8.6x10 <sup>-7</sup> | $\beta=3.25$ ,<br>SE=0.76,<br>P=1.9x10 <sup>-5</sup>  | $\beta=2.93$ ,<br>SE=0.75,<br>P=8.3x10 <sup>-5</sup>  |
| 17  | SPHK1 | rs9892909 | 71884670      | T/C                        | 0.0977 | 1      | $\beta=-2.28$ ,<br>SE=0.50,<br>P=5.3x10 <sup>-6</sup> | $\beta=-1.82$ ,<br>SE=0.48,<br>P=1.5x10 <sup>-4</sup> | $\beta=-1.39$ ,<br>SE=0.48<br>P=3.9x10 <sup>-3</sup>  |
| 11  | KCNQ1 | rs2283210 | 2704481       | G/C                        | 0.0225 | 0.4039 | $\beta=-4.22$ ,<br>SE=0.97,<br>P=1.5x10 <sup>-5</sup> | $\beta=-4.23$ ,<br>SE=0.91,<br>3.1x10 <sup>-6</sup>   | $\beta=-3.78$ ,<br>SE=0.96,<br>P=7.9x10 <sup>-5</sup> |
| 2   | PDE1A | rs2623410 | 182880609     | A/G                        | 0.0122 | 1      | $\beta=-4.63$ ,<br>SE=1.13,<br>4.3x10 <sup>-5</sup>   | $\beta=-4.04$ ,<br>SE=1.05,<br>P=1.2x10 <sup>-4</sup> | $\beta=-3.66$ ,<br>SE=1.05,<br>P=7.3x10 <sup>-4</sup> |
| 5   | THBS4 | rs443095  | 79398306      | T/C                        | 0.0176 | 0.2688 | $\beta=-4.08$<br>SE=1.00,<br>P=5.0x10 <sup>-5</sup>   | $\beta=-3.66$ ,<br>SE=1.05<br>P=2.5x10 <sup>-4</sup>  | $\beta=-3.46$ ,<br>SE=1.02,<br>P=6.8x10 <sup>-4</sup> |

Ch – chromosome; SNP – single nucleotide polymorphism; bp – base pair; MAF – minor allele frequency in parents; HWE – statistical significance of Hardy-Weinberg equilibrium test (in parents), Reference analysis - the primary association analysis, Sensitivity analysis 1 - analysis based on using antihypertensive treatment unadjusted values, Sensitivity analysis 2 - analysis based on exclusion of subjects on antihypertensive treatment,  $\beta$  – regression coefficient, SE – standard error

**Table S7.** SNPs showing significant and suggestive associations with mean 24-hour DBP in the GRAPHIC Study – sensitivity analysis.

| Chr | Locus       | SNP        | Location (bp) | Minor (coded)/major allele | MAF    | HWE    | Reference analysis                                     | Sensitivity analysis 1                                | Sensitivity analysis 2                                |
|-----|-------------|------------|---------------|----------------------------|--------|--------|--------------------------------------------------------|-------------------------------------------------------|-------------------------------------------------------|
| 1   | MTHFR/CLCN6 | rs13306560 | 11788770      | A/G                        | 0.0527 | 0.1963 | $\beta=-2.63$ ,<br>SE=0.46,<br>P=1.2x10 <sup>-8</sup>  | $\beta=-2.38$ ,<br>SE=0.42,<br>P=1.6x10 <sup>-8</sup> | $\beta=-2.29$ ,<br>SE=0.42,<br>P=5.4x10 <sup>-8</sup> |
| 1   | PTGS2       | rs4648310  | 184907148     | G/A                        | 0.0273 | 0.0363 | $\beta=-2.26$ ,<br>SE=0.50,<br>P=5.9x10 <sup>-6</sup>  | $\beta=-2.14$ ,<br>SE=0.48,<br>P=7.3x10 <sup>-6</sup> | $\beta=-1.77$ ,<br>SE=0.48,<br>P=5.9x10 <sup>-6</sup> |
| 1   | NPPB        | rs11801879 | 11851406      | C/T                        | 0.0898 | 0.5639 | $\beta=-1.80$ ,<br>SE=0.40,<br>P=7.7x10 <sup>-6</sup>  | $\beta=-1.70$ ,<br>SE=0.38,<br>P=6.0x10 <sup>-6</sup> | $\beta=-1.62$ ,<br>SE=0.38,<br>P=1.8x10 <sup>-5</sup> |
| 1   | MTHFR       | rs17037388 | 11780623      | G/A                        | 0.168  | 0.577  | $\beta=-1.26$ ,<br>SE=0.28,<br>P=9.1x10 <sup>-6</sup>  | $\beta=-1.19$ ,<br>SE=0.27,<br>P=8.8x10 <sup>-6</sup> | $\beta=-1.10$ ,<br>SE=0.28,<br>P=6.2x10 <sup>-5</sup> |
| 1   | MTHFR       | rs17037390 | 11783430      | A/G                        | 0.1685 | 0.5769 | $\beta=-1.25$ ,<br>SE=0.28,<br>1.2x10 <sup>-5</sup>    | $\beta=-1.20$ ,<br>SE=0.27,<br>P=9.6x10 <sup>-6</sup> | $\beta=-1.11$ ,<br>SE=0.28,<br>P=6.7x10 <sup>-5</sup> |
| 1   | MTHFR       | rs17367504 | 11785365      | G/A                        | 0.165  | 0.7344 | $\beta=-1.25$ ,<br>SE= 0.29,<br>P=1.8x10 <sup>-5</sup> | $\beta=-1.16$ ,<br>SE=0.27,<br>P=2.1x10 <sup>-5</sup> | $\beta=-1.09$ ,<br>SE=0.28,<br>P=1.1x10 <sup>-4</sup> |
| 1   | MTHFR       | rs13306561 | 11788391      | C/T                        | 0.1689 | 0.9113 | $\beta=-1.20$ ,<br>SE=0.29,<br>P=3.0x10 <sup>-5</sup>  | $\beta=-1.12$ ,<br>SE=0.27,<br>P=3.6x10 <sup>-5</sup> | $\beta=-1.06$ ,<br>SE=0.28,<br>P=1.7x10 <sup>-4</sup> |
| 17  | NLRP1       | rs925596   | 5428823       | G/A                        | 0.1129 | 0.2117 | $\beta=1.44$ ,<br>SE=0.36,<br>5.2x10 <sup>-5</sup>     | $\beta=1.25$ ,<br>SE=0.36,<br>P=4.5x10 <sup>-4</sup>  | $\beta=1.39$ ,<br>SE=0.36,<br>P=1.0x10 <sup>-4</sup>  |
| 8   | CPA6        | rs6993502  | 68740520      | G/A                        | 0.022  | 0.3899 | $\beta=-2.61$<br>SE=0.64,<br>P=5.2x10 <sup>-5</sup>    | $\beta=-2.58$ ,<br>SE=0.60,<br>P=1.6x10 <sup>-5</sup> | $\beta=-2.53$ ,<br>SE=0.62,<br>P=5.2x10 <sup>-5</sup> |
| 2   | STAT1       | rs2280232  | 191559011     | G/T                        | 0.2261 | 1      | $\beta=1.11$ ,<br>SE=0.28,<br>P=5.7x10 <sup>-5</sup>   | $\beta=1.03$ ,<br>SE=0.26,<br>7.1x10 <sup>-5</sup>    | $\beta=1.04$ ,<br>SE=0.27,<br>P=1.0x10 <sup>-4</sup>  |

|    |      |            |          |     |        |        |                                                       |                                                      |                                                      |
|----|------|------------|----------|-----|--------|--------|-------------------------------------------------------|------------------------------------------------------|------------------------------------------------------|
| 6  | AGER | rs1035798  | 32259200 | T/C | 0.2314 | 1      | $\beta=1.10,$<br>SE=0.28,<br>P=6.6x10 <sup>-5</sup>   | $\beta=1.07,$<br>SE=0.26,<br>3.8x10 <sup>-5</sup>    | $\beta=1.01,$<br>SE=0.27,<br>P=2.1x10 <sup>-4</sup>  |
| 3  | CISH | rs873985   | 50626755 | G/A | 0.1514 | 1      | $\beta=-1.27,$<br>SE= 0.32,<br>P=6.7x10 <sup>-5</sup> | $\beta=-1.12,$<br>SE=0.30,<br>P=1.0x10 <sup>-4</sup> | $\beta=-1.29,$<br>SE=0.30<br>P=1.8x10 <sup>-5</sup>  |
| 17 | NOG  | rs12603626 | 52037330 | A/C | 0.3701 | 0.4609 | $\beta=-0.95$<br>SE=0.24<br>P=6.8x10 <sup>-5</sup>    | $\beta=-0.94,$<br>SE=0.23,<br>P=3.4x10 <sup>-5</sup> | $\beta=-0.77,$<br>SE=0.23,<br>P=8.8x10 <sup>-4</sup> |

Ch – chromosome; SNP – single nucleotide polymorphism; bp – base pair; MAF – minor allele frequency in parents; HWE – statistical significance of Hardy-Weinberg equilibrium test (in parents); Reference analysis - the primary association analysis, Sensitivity analysis 1 - analysis based on using antihypertensive treatment unadjusted values, Sensitivity analysis 2 - analysis based on exclusion of subjects on antihypertensive treatment,  $\beta$  – regression coefficient, SE – standard error

**Table S8.** SNPs showing significant or suggestive associations with mean 24-hour BP in the GRAPHIC Study - analysis of association with clinic BP in CoLaus cohort.

| Ch | Locus | SNP        | Minor<br>(coded)/<br>major allele | MAF    | HWE    | r <sup>2</sup> hat | Clinic SBP            |         | Clinic DBP            |         |
|----|-------|------------|-----------------------------------|--------|--------|--------------------|-----------------------|---------|-----------------------|---------|
|    |       |            |                                   |        |        |                    | β-coefficient<br>(SE) | P-value | β-coefficient<br>(SE) | P-value |
| 1  | USH2A | rs2797221  | T/C                               | 0.0162 | 0.1101 | 0.96               | 1.76 (1.38)           | 0.2020  | 1.44 (0.89)           | 0.1064  |
| 17 | SPHK1 | rs9892909  | T/C                               | 0.1182 | 0.0452 | 0.83               | -0.14 (0.54)          | 0.7923  | 0.08 (0.35)           | 0.8086  |
| 11 | KCNQ1 | rs2283210  | G/C                               | 0.0087 | 1.0000 | 0.58               | -2.06 (2.30)          | 0.3717  | -0.88 (1.48)          | 0.5502  |
| 2  | PDE1A | rs2623410  | T/C                               | 0.0107 | 0.0922 | 0.61               | 2.41 (2.22)           | 0.2783  | 0.88 (1.43)           | 0.5357  |
| 5  | THBS4 | rs443095   | T/C                               | 0.0257 | 0.4005 | 1.00               | -1.93 (1.10)          | 0.0787  | -0.65 (0.71)          | 0.3564  |
| 1  | NPPB  | rs11801879 | C/T                               | 0.0842 | 0.6143 | 0.73               | -0.11 (0.72)          | 0.8771  | -0.09 (0.46)          | 0.8532  |
| 1  | MTHFR | rs17037390 | A/G                               | 0.1422 | 0.1606 | 1.00               | -0.67 (0.50)          | 0.1870  | -0.59 (0.32)          | 0.0702  |
| 1  | MTHFR | rs17367504 | G/A                               | 0.1419 | 0.1774 | 1.00               | -0.66 (0.50)          | 0.1938  | -0.57 (0.32)          | 0.0778  |
| 1  | MTHFR | rs13306561 | C/T                               | 0.1603 | 0.0958 | 0.88               | -0.61 (0.50)          | 0.2284  | -0.55 (0.32)          | 0.0909  |
| 17 | NLRP1 | rs925596   | G/A                               | 0.1191 | 0.5246 | 0.70               | -0.13 (0.58)          | 0.8159  | -0.19 (0.37)          | 0.6016  |
| 8  | CPA6  | rs6993502  | G/A                               | 0.0254 | 1.0000 | 1.00               | 0.96 (1.10)           | 0.3860  | 0.44 (0.71)           | 0.5349  |
| 2  | STAT1 | rs2280232  | G/T                               | 0.3339 | 0.8354 | 0.69               | 0.27 (0.41)           | 0.5123  | 0.26 (0.26)           | 0.3121  |
| 6  | AGER  | rs1035798  | T/C                               | 0.2184 | 0.3473 | 0.96               | 0.47 (0.43)           | 0.2730  | 0.40 (0.28)           | 0.1433  |
| 3  | CISH  | rs873985   | G/A                               | 0.1458 | 0.4414 | 1.00               | -0.22 (0.49)          | 0.6607  | 0.07 (0.32)           | 0.8340  |
| 17 | NOG   | rs12603626 | A/C                               | 0.3544 | 0.6267 | 0.99               | 0.31 (0.37)           | 0.3967  | 0.04 (0.24)           | 0.8578  |

SNP – single nucleotide polymorphism, Ch – chromosome, MAF – minor allele frequency, HWE – level of statistical significance of Hardy-Weinberg equilibrium test, r<sup>2</sup>hat – imputation accuracy coefficient, β-coefficient – estimated quantitative effect of each SNP minor allele copy on BP (adjusted for age, age<sup>2</sup>, sex and antihypertensive medication); a negative β indicates lower BP in carriers of the minor allele, SE – standard error, P-value – level of statistical significance, information on PTGS2 rs4648310 and MTHFR rs17037388 SNPs was not available in CoLaus Study

**Table S9.** Association between rs13306560 and mean 24-hour DBP in the GRAPHIC Study – body mass index-related sensitivity analysis.

| SNP        | Minor (coded) allele | Phenotype        | Covariates in the model                     | $\beta$ (SE) | P-value              |
|------------|----------------------|------------------|---------------------------------------------|--------------|----------------------|
| rs13306560 | A                    | mean 24-hour DBP | age,age <sup>2</sup> , sex                  | -2.63 (0.46) | 1.2x10 <sup>-8</sup> |
|            |                      |                  | age,age <sup>2</sup> , sex, body mass index | -2.59 (0.47) | 3.3x10 <sup>-8</sup> |

SNP – single nucleotide polymorphism;  $\beta$  – estimated quantitative effect of each minor allele copy of rs13306560 on adjusted (for antihypertensive treatment effect and other covariates) mean 24-hour DBP, SE – standard error; P-value – level of statistical significance



**Table S10.** The most significant associations between mean 24-hour SBP and SNPs in 105 most relevant BP candidate genes.

| No | Ch | Gene symbol | Total number of SNPs | Top SNP    | Location (bp) | Minor (coded) allele | Minor allele frequency - parents | HWE - parents | $\beta$ -coefficient | Standard error | P-value | q-value |
|----|----|-------------|----------------------|------------|---------------|----------------------|----------------------------------|---------------|----------------------|----------------|---------|---------|
| 1  | 17 | ACE         | 24                   | rs4295     | 58910030      | G                    | 0.3855                           | 1             | -0.52                | 0.34           | 0.1309  | 0.9436  |
| 2  | 16 | ACSM3       | 8                    | rs2301770  | 20709673      | T                    | 0.0742                           | 0.6477        | -0.84                | 0.66           | 0.2074  | 0.9515  |
| 3  | 10 | ACTA2       | 6                    | rs17114302 | 90699305      | C                    | 0.0645                           | 1             | 1.21                 | 0.81           | 0.1355  | 0.9436  |
| 4  | 12 | ACVRL1      | 6                    | rs11169953 | 50590666      | T                    | 0.3096                           | 0.3071        | 0.63                 | 0.38           | 0.103   | 0.9374  |
| 5  | 11 | ADM         | 5                    | rs11042727 | 10289959      | G                    | 0.0752                           | 0.8232        | -1.11                | 0.65           | 0.0862  | 0.9368  |
| 6  | 1  | ADORA3      | 35                   | rs2800889  | 111844255     | T                    | 0.022                            | 1             | 1.33                 | 0.94           | 0.159   | 0.9438  |
| 7  | 8  | ADRA1A      | 82                   | rs2644628  | 26770589      | T                    | 0.0518                           | 0.7494        | 2.89                 | 0.89           | 0.0011  | 0.5473  |
| 8  | 5  | ADRA1B      | 13                   | rs2030373  | 159280059     | T                    | 0.2439                           | 0.9325        | -0.66                | 0.39           | 0.0945  | 0.9374  |
| 9  | 20 | ADRA1D      | 14                   | rs8183794  | 4158448       | T                    | 0.1772                           | 0.5918        | -1.13                | 0.42           | 0.0073  | 0.7503  |
| 10 | 10 | ADRA2A      | 14                   | rs17186196 | 112821777     | G                    | 0.0815                           | 0.0186        | -1.2                 | 0.59           | 0.0406  | 0.9066  |
| 11 | 2  | ADRA2B      | 5                    | rs29000579 | 96140615      | G                    | 0.0249                           | 0.4722        | 1.43                 | 1.03           | 0.1652  | 0.9462  |
| 12 | 4  | ADRA2C      | 17                   | rs4916612  | 3719953       | A                    | 0.0903                           | 0.4505        | 2.14                 | 0.69           | 0.002   | 0.5731  |
| 13 | 10 | ADRB1       | 21                   | rs7076938  | 115779365     | C                    | 0.2778                           | 0.9379        | -0.62                | 0.4            | 0.1274  | 0.9436  |
| 14 | 5  | ADRB2       | 12                   | rs33942282 | 148189011     | A                    | 0.0352                           | 1             | -1.73                | 1.1            | 0.1161  | 0.9429  |
| 15 | 8  | ADRB3       | 6                    | rs28434339 | 37944313      | T                    | 0.0289                           | 0.578         | 2.09                 | 1              | 0.0356  | 0.8928  |
| 16 | 11 | ADRBK1      | 4                    | rs12274774 | 66803077      | A                    | 0.0122                           | 1             | 1.53                 | 1.18           | 0.1937  | 0.9512  |
| 17 | 1  | AGT         | 44                   | rs11568030 | 228913466     | A                    | 0.0513                           | 0.105         | -1.28                | 0.69           | 0.0641  | 0.9327  |
| 18 | 3  | AGTR1       | 51                   | rs12695903 | 149932302     | A                    | 0.0537                           | 0.5292        | -1.47                | 0.58           | 0.0119  | 0.7764  |
| 19 | 1  | AGTRAP      | 9                    | rs4073395  | 11723290      | T                    | 0.3203                           | 0.9428        | -0.77                | 0.36           | 0.033   | 0.8802  |
| 20 | 11 | AGTRL1      | 3                    | rs11544374 | 56761153      | A                    | 0.2678                           | 0.5239        | 0.45                 | 0.39           | 0.2454  | 0.9561  |
| 21 | 19 | APOE        | 7                    | rs8106922  | 50093506      | G                    | 0.3925                           | 0.3586        | -0.17                | 0.36           | 0.6349  | 0.9814  |
| 22 | 12 | ATP2A2      | 5                    | rs1860561  | 109267624     | A                    | 0.2227                           | 0.2058        | 0.55                 | 0.42           | 0.1929  | 0.9509  |
| 23 | 20 | AVP         | 11                   | rs2422840  | 3024384       | G                    | 0.2177                           | 0.0099        | -0.69                | 0.41           | 0.0937  | 0.9374  |
| 24 | 12 | AVPR1A      | 4                    | rs1042615  | 61830476      | T                    | 0.4329                           | 1             | 0.74                 | 0.36           | 0.0384  | 0.8979  |
| 25 | 14 | BDKRB2      | 29                   | rs4905459  | 95741884      | A                    | 0.0816                           | 0.6741        | -1.33                | 0.61           | 0.0281  | 0.8779  |
| 26 | 2  | BMPR2       | 10                   | rs17199235 | 203128104     | G                    | 0.1235                           | 0.3852        | 0.81                 | 0.52           | 0.1185  | 0.9436  |
| 27 | 5  | CARTPT      | 7                    | rs10515114 | 71049590      | C                    | 0.0991                           | 0.162         | -0.44                | 0.61           | 0.4734  | 0.9750  |
| 28 | 3  | CAV3        | 24                   | rs2268484  | 8748950       | C                    | 0.2769                           | 0.5851        | -0.75                | 0.38           | 0.0505  | 0.9156  |
| 29 | 14 | CMA1        | 6                    | rs1956917  | 24050332      | T                    | 0.3569                           | 0.276         | -0.49                | 0.37           | 0.1849  | 0.9494  |

|    |    |         |    |            |           |   |        |        |       |      |        |        |
|----|----|---------|----|------------|-----------|---|--------|--------|-------|------|--------|--------|
| 30 | 7  | COL1A2  | 28 | rs369982   | 93886418  | A | 0.4404 | 0.2047 | -0.75 | 0.33 | 0.0237 | 0.8558 |
| 31 | 4  | CORIN   | 59 | rs16860440 | 47298612  | G | 0.0879 | 0.4321 | 1.16  | 0.62 | 0.0614 | 0.9310 |
| 32 | 11 | CSRP3   | 11 | rs1346118  | 19176075  | C | 0.166  | 0.2608 | 0.7   | 0.48 | 0.1463 | 0.9436 |
| 33 | 20 | CST3    | 6  | rs911122   | 23573746  | G | 0.4058 | 0.4357 | -0.63 | 0.37 | 0.0859 | 0.9368 |
| 34 | 14 | CTSG    | 8  | rs1885597  | 24112908  | G | 0.457  | 0.285  | -0.62 | 0.35 | 0.0786 | 0.9336 |
| 35 | 8  | CYP11B1 | 2  | rs5297     | 143952659 | C | 0.083  | 0.6798 | 0.39  | 0.61 | 0.5231 | 0.9786 |
| 36 | 8  | CYP11B2 | 8  | rs11781082 | 143996903 | A | 0.2837 | 0.2186 | 0.41  | 0.38 | 0.2835 | 0.9589 |
| 37 | 1  | CYP2J2  | 6  | rs10493270 | 60161262  | A | 0.0864 | 1      | 1.11  | 0.66 | 0.0917 | 0.9374 |
| 38 | 2  | DES     | 7  | rs907684   | 220007516 | C | 0.0366 | 0.6422 | -1.44 | 0.86 | 0.0915 | 0.9374 |
| 39 | 19 | DMPK    | 5  | rs2854300  | 50966232  | G | 0.041  | 0.4094 | -1.07 | 0.89 | 0.2294 | 0.9545 |
| 40 | 11 | DRD2    | 19 | rs11214611 | 112835429 | G | 0.1479 | 0.4578 | 0.96  | 0.53 | 0.0666 | 0.9327 |
| 41 | 3  | DRD3    | 18 | rs3732783  | 115373479 | G | 0.0503 | 0.7385 | -1.32 | 0.79 | 0.0944 | 0.9374 |
| 42 | 1  | ECE1    | 17 | rs213051   | 21494123  | G | 0.3125 | 1      | -0.96 | 0.39 | 0.0129 | 0.7796 |
| 43 | 6  | EDN1    | 27 | rs4714384  | 12405839  | C | 0.306  | 0.1622 | 0.66  | 0.39 | 0.0886 | 0.9374 |
| 44 | 1  | EDN2    | 27 | rs4660541  | 41727031  | T | 0.2669 | 0.3798 | -0.93 | 0.38 | 0.016  | 0.8174 |
| 45 | 20 | EDN3    | 10 | rs11570248 | 57307333  | G | 0.0855 | 0.6907 | 1.22  | 0.59 | 0.0401 | 0.9066 |
| 46 | 4  | EDNRA   | 17 | rs6822565  | 148656962 | C | 0.2319 | 0.3343 | 1.29  | 0.38 | 0.0007 | 0.5238 |
| 47 | 13 | EDNRB   | 14 | rs3027129  | 77384402  | T | 0.0625 | 0.7916 | -1.01 | 0.69 | 0.1451 | 0.9436 |
| 48 | 2  | EPAS1   | 38 | rs7579899  | 46391108  | A | 0.4062 | 0.6978 | -0.94 | 0.36 | 0.0083 | 0.7545 |
| 49 | 8  | EPHX2   | 12 | rs11780471 | 27400636  | A | 0.0674 | 0.4541 | 0.8   | 0.73 | 0.2738 | 0.9581 |
| 50 | 1  | ACOT11  | 47 | rs11589310 | 54785469  | T | 0.21   | 0.3473 | 0.45  | 0.42 | 0.279  | 0.9581 |
| 51 | 6  | FOXC1   | 12 | rs2745593  | 1548401   | G | 0.4922 | 0.7546 | -0.42 | 0.34 | 0.2128 | 0.9515 |
| 52 | 16 | FOXC2   | 8  | rs4843165  | 85162542  | T | 0.2696 | 0.9367 | -0.91 | 0.36 | 0.0119 | 0.7764 |
| 53 | 17 | GAA     | 5  | rs12452616 | 75704676  | A | 0.2778 | 0.2425 | -0.21 | 0.39 | 0.5873 | 0.9803 |
| 54 | 14 | GCH1    | 6  | rs4411417  | 54390313  | C | 0.2021 | 0.5608 | -0.47 | 0.43 | 0.2727 | 0.9581 |
| 55 | 1  | GCLM    | 5  | rs7533596  | 94120717  | A | 0.373  | 0.7386 | -0.25 | 0.36 | 0.498  | 0.9756 |
| 56 | 12 | GNB3    | 9  | rs5439     | 6819143   | C | 0.0911 | 0.4502 | -0.43 | 0.7  | 0.5383 | 0.9790 |
| 57 | 3  | GPX1    | 2  | rs1800668  | 49370761  | T | 0.3047 | 0.4171 | 0.34  | 0.39 | 0.3841 | 0.9692 |
| 58 | 11 | HBB     | 6  | rs11036351 | 5202576   | T | 0.4604 | 0.2849 | 0.76  | 0.35 | 0.0329 | 0.8802 |
| 59 | 5  | HBEGF   | 8  | rs1042184  | 139706145 | T | 0.0745 | 0.258  | -0.47 | 0.62 | 0.4494 | 0.9722 |
| 60 | 15 | HCN4    | 16 | rs7172808  | 71450685  | G | 0.1611 | 0.729  | 1.12  | 0.52 | 0.0316 | 0.8802 |
| 61 | 22 | HMOX1   | 15 | rs17883419 | 34121971  | T | 0.044  | 1      | -1.13 | 0.73 | 0.1207 | 0.9436 |
| 62 | 1  | ADORA3  | 35 | rs2789535  | 111884087 | G | 0.4854 | 1      | 0.18  | 0.35 | 0.6143 | 0.9811 |
| 63 | 16 | HSD11B2 | 2  | rs6499129  | 66015752  | C | 0.0991 | 0.0344 | 1.3   | 0.62 | 0.0359 | 0.8939 |
| 64 | 1  | HSPB7   | 6  | rs1056207  | 16217414  | T | 0.0883 | 0.6928 | 1.15  | 0.63 | 0.0671 | 0.9327 |

|    |    |        |     |            |           |   |        |        |       |      |                                  |        |
|----|----|--------|-----|------------|-----------|---|--------|--------|-------|------|----------------------------------|--------|
| 65 | 12 | IGF1   | 34  | rs17882264 | 101395486 | G | 0.0894 | 0.0524 | -1.24 | 0.54 | 0.022                            | 0.8521 |
| 66 | 21 | KCNE1  | 28  | rs1892593  | 34748230  | A | 0.3213 | 0.1516 | -0.61 | 0.37 | 0.0984                           | 0.9374 |
| 67 | 21 | KCNE2  | 11  | rs12626687 | 34655160  | A | 0.3047 | 0.5557 | -0.97 | 0.37 | 0.008                            | 0.7545 |
| 68 | 7  | KCNH2  | 11  | rs3807373  | 150299654 | T | 0.2988 | 0.3709 | 0.94  | 0.39 | 0.0174                           | 0.8265 |
| 69 | 12 | KCNJ8  | 2   | rs829064   | 21831775  | G | 0.167  | 0.7363 | 0.31  | 0.48 | 0.5144                           | 0.9780 |
| 70 | 11 | KCNQ1  | 195 | rs2283210  | 2704481   | G | 0.0225 | 0.4039 | -4.22 | 0.97 | 1.5 <sup>x10</sup> <sup>-5</sup> | 0.1095 |
| 71 | 3  | KNG1   | 23  | rs1392952  | 187913716 | T | 0.1245 | 1      | -0.84 | 0.54 | 0.1214                           | 0.9436 |
| 72 | 3  | MYL3   | 6   | rs6768627  | 46870380  | T | 0.0669 | 1      | 1.04  | 0.71 | 0.1428                           | 0.9436 |
| 73 | 3  | NISCH  | 10  | rs17263770 | 52494894  | C | 0.1294 | 0.4063 | 0.64  | 0.51 | 0.2094                           | 0.9515 |
| 74 | 17 | NOS2A  | 67  | rs8081248  | 23106091  | A | 0.4455 | 0.4471 | -0.62 | 0.38 | 0.1024                           | 0.9374 |
| 75 | 7  | NOS3   | 26  | rs2853796  | 150334848 | G | 0.4692 | 0.802  | -1.02 | 0.35 | 0.0038                           | 0.6720 |
| 76 | 1  | NPPA   | 10  | rs198372   | 11832101  | A | 0.1309 | 0.4093 | -1.48 | 0.49 | 0.0026                           | 0.5955 |
| 77 | 1  | NPPB   | 11  | rs11801879 | 11851406  | C | 0.0898 | 0.5639 | -2.06 | 0.58 | 0.0004                           | 0.5028 |
| 78 | 2  | NPPC   | 14  | rs11679292 | 232507906 | T | 0.0195 | 1      | -2.77 | 0.84 | 0.0009                           | 0.5241 |
| 79 | 1  | NPR1   | 6   | rs7543790  | 151936937 | T | 0.0567 | 0.3694 | 1.12  | 0.75 | 0.1317                           | 0.9436 |
| 80 | 9  | NPR2   | 6   | rs1407295  | 35795161  | A | 0.0836 | 0.8378 | 1     | 0.71 | 0.1585                           | 0.9437 |
| 81 | 5  | NPR3   | 22  | rs1421811  | 32750027  | C | 0.4007 | 0.1033 | -0.64 | 0.34 | 0.0587                           | 0.9279 |
| 82 | 7  | NPY    | 8   | rs16135    | 24294445  | T | 0.0742 | 0.2563 | -0.82 | 0.72 | 0.2598                           | 0.9578 |
| 83 | 4  | NPY1R  | 6   | rs12510421 | 164469886 | C | 0.104  | 0.0021 | 1.07  | 0.6  | 0.0759                           | 0.9327 |
| 84 | 4  | NPY2R  | 7   | rs10212868 | 156346717 | C | 0.3926 | 0.359  | -1    | 0.35 | 0.0042                           | 0.6886 |
| 85 | 12 | P2RX4  | 5   | rs7961979  | 120155644 | A | 0.1338 | 0.6851 | -0.67 | 0.5  | 0.1849                           | 0.9494 |
| 86 | 9  | PCSK5  | 156 | rs1538843  | 77791088  | G | 0.0758 | 0.508  | -1.5  | 0.58 | 0.0096                           | 0.7607 |
| 87 | 6  | PLN    | 3   | rs9481825  | 118982785 | A | 0.1672 | 0.3129 | 1.17  | 0.46 | 0.0109                           | 0.7755 |
| 88 | 2  | POMC   | 9   | rs6545975  | 25238989  | C | 0.4053 | 0.3993 | -0.59 | 0.34 | 0.0842                           | 0.9368 |
| 89 | 3  | PPARG  | 59  | rs4684846  | 12313849  | G | 0.249  | 0.6763 | -1.33 | 0.41 | 0.0011                           | 0.5473 |
| 90 | 9  | PTGS1  | 20  | rs10306108 | 124171301 | C | 0.0654 | 1      | 1.29  | 0.71 | 0.0677                           | 0.9327 |
| 91 | 1  | PTGS2  | 24  | rs4648310  | 184907148 | G | 0.0273 | 0.0363 | -2.41 | 0.84 | 0.0039                           | 0.6786 |
| 92 | 1  | REN    | 28  | rs11571084 | 202395455 | A | 0.0411 | 1      | 1.58  | 0.91 | 0.0819                           | 0.9368 |
| 93 | 3  | SCN5A  | 43  | rs6797133  | 38631037  | A | 0.3916 | 1      | 0.59  | 0.34 | 0.0861                           | 0.9368 |
| 94 | 7  | SEMA3C | 2   | rs17154557 | 80323912  | A | 0.0562 | 0.1273 | 0.57  | 0.88 | 0.5149                           | 0.9780 |
| 95 | 21 | SOD1   | 4   | rs9974610  | 31940240  | G | 0.1763 | 0.1313 | 0.6   | 0.5  | 0.2305                           | 0.9550 |
| 96 | 6  | SOD2   | 21  | rs2758352  | 160042911 | A | 0.2312 | 0.6609 | 1.05  | 0.41 | 0.0108                           | 0.7755 |
| 97 | 7  | SRI    | 8   | rs4728737  | 87677464  | G | 0.0508 | 1      | 1.66  | 0.95 | 0.0812                           | 0.9368 |
| 98 | 19 | TBXA2R | 8   | rs8105780  | 3543171   | T | 0.3495 | 0.4095 | 0.24  | 0.38 | 0.5214                           | 0.9786 |
| 99 | 1  | TGFB2  | 25  | rs17047682 | 216589648 | G | 0.0674 | 1      | 1.42  | 0.67 | 0.0342                           | 0.8855 |

|     |    |       |    |           |           |   |        |        |       |      |        |        |
|-----|----|-------|----|-----------|-----------|---|--------|--------|-------|------|--------|--------|
| 100 | 11 | TH    | 6  | rs6356    | 2147527   | A | 0.3594 | 0.3775 | 0.39  | 0.39 | 0.3151 | 0.9659 |
| 101 | 19 | TNNI3 | 9  | rs3729838 | 60360122  | C | 0.1799 | 0.9156 | 0.5   | 0.48 | 0.2967 | 0.9602 |
| 102 | 1  | TNNT2 | 13 | rs2799691 | 199614966 | C | 0.2544 | 0.0699 | 0.53  | 0.39 | 0.173  | 0.9466 |
| 103 | 15 | TPM1  | 10 | rs4075583 | 61127280  | G | 0.3465 | 0.0532 | 0.75  | 0.35 | 0.0308 | 0.8802 |
| 104 | 1  | UTS2  | 12 | rs707476  | 7840693   | T | 0.3105 | 0.1257 | -0.76 | 0.38 | 0.044  | 0.9069 |
| 105 | 7  | WNT2  | 11 | rs39310   | 116739977 | C | 0.2681 | 0.233  | -0.67 | 0.38 | 0.0768 | 0.9327 |

Ch – chromosome, top SNP – single nucleotide polymorphism in a given gene with the most significant association with mean 24-hour SBP, bp – base pair, HWE - statistical significance of Hardy-Weinberg equilibrium test,  $\beta$ -coefficient - estimated quantitative effect of each SNP minor (coded) allele copy on mean 24-hour SBP (adjusted for age, age<sup>2</sup>, sex and BP-lowering medication), P-value –statistical significance, q-value – false positive discovery rate

**Table S11.** The most significant associations between mean 24-hour DBP and SNPs in 105 most relevant BP candidate genes.

| No | Ch | Gene symbol | Total number of SNPs | Top SNP    | Location (bp) | Minor (coded) allele | Minor allele frequency - parents | HWE - parents | $\beta$ -coefficient | Standard error | P-value | q-value |
|----|----|-------------|----------------------|------------|---------------|----------------------|----------------------------------|---------------|----------------------|----------------|---------|---------|
| 1  | 17 | ACE         | 24                   | rs4611524  | 58945384      | T                    | 0.4243                           | 0.0474        | -0.48                | 0.23           | 0.0398  | 0.9061  |
| 2  | 16 | ACSM3       | 8                    | rs2301770  | 20709673      | T                    | 0.0742                           | 0.6477        | -0.47                | 0.46           | 0.3138  | 0.9654  |
| 3  | 10 | ACTA2       | 6                    | rs17114302 | 90699305      | C                    | 0.0645                           | 1             | 0.53                 | 0.49           | 0.2848  | 0.9597  |
| 4  | 12 | ACVRL1      | 6                    | rs11169953 | 50590666      | T                    | 0.3096                           | 0.3071        | 0.5                  | 0.26           | 0.0542  | 0.9240  |
| 5  | 11 | ADM         | 5                    | rs11042727 | 10289959      | G                    | 0.0752                           | 0.8232        | -0.89                | 0.45           | 0.0494  | 0.9150  |
| 6  | 1  | ADORA3      | 35                   | rs2800889  | 111844255     | T                    | 0.022                            | 1             | 0.44                 | 0.79           | 0.5742  | 0.9798  |
| 7  | 8  | ADRA1A      | 82                   | rs17296809 | 26762260      | C                    | 0.061                            | 1             | 1.59                 | 0.49           | 0.0011  | 0.5473  |
| 8  | 5  | ADRA1B      | 13                   | rs2030373  | 159280059     | T                    | 0.2439                           | 0.9325        | -0.49                | 0.26           | 0.0557  | 0.9240  |
| 9  | 20 | ADRA1D      | 14                   | rs8183794  | 4158448       | T                    | 0.1772                           | 0.5918        | -0.35                | 0.3            | 0.244   | 0.9560  |
| 10 | 10 | ADRA2A      | 14                   | rs17186196 | 112821777     | G                    | 0.0815                           | 0.0186        | -0.5                 | 0.43           | 0.2421  | 0.9558  |
| 11 | 2  | ADRA2B      | 5                    | rs29000579 | 96140615      | G                    | 0.0249                           | 0.4722        | 1.05                 | 0.66           | 0.1092  | 0.9386  |
| 12 | 4  | ADRA2C      | 17                   | rs4916613  | 3723384       | T                    | 0.04                             | 0.4027        | 2.01                 | 0.68           | 0.003   | 0.6368  |
| 13 | 10 | ADRB1       | 21                   | rs7076938  | 115779365     | C                    | 0.2778                           | 0.9379        | -0.49                | 0.28           | 0.0803  | 0.9358  |
| 14 | 5  | ADRB2       | 12                   | rs33942282 | 148189011     | A                    | 0.0352                           | 1             | -0.88                | 0.72           | 0.2181  | 0.9519  |
| 15 | 8  | ADRB3       | 6                    | rs28434339 | 37944313      | T                    | 0.0289                           | 0.578         | 0.62                 | 0.67           | 0.3577  | 0.9677  |
| 16 | 11 | ADRBK1      | 4                    | rs12274774 | 66803077      | A                    | 0.0122                           | 1             | 0.28                 | 0.91           | 0.7554  | 0.9846  |
| 17 | 1  | AGT         | 44                   | rs11568030 | 228913466     | A                    | 0.0513                           | 0.105         | -0.36                | 0.49           | 0.4705  | 0.9750  |
| 18 | 3  | AGTR1       | 51                   | rs12695903 | 149932302     | A                    | 0.0537                           | 0.5292        | -0.81                | 0.48           | 0.0933  | 0.9374  |
| 19 | 1  | AGTRAP      | 9                    | rs11121816 | 11723065      | G                    | 0.3413                           | 0.5316        | 0.68                 | 0.36           | 0.0608  | 0.9466  |
| 20 | 11 | AGTRL1      | 3                    | rs2282624  | 56758487      | C                    | 0.3242                           | 0.6687        | -0.4                 | 0.4            | 0.3191  | 0.9706  |
| 21 | 19 | APOE        | 7                    | rs8106922  | 50093506      | G                    | 0.3925                           | 0.3586        | -0.37                | 0.25           | 0.1369  | 0.9436  |
| 22 | 12 | ATP2A2      | 5                    | rs1860561  | 109267624     | A                    | 0.2227                           | 0.2058        | 0.3                  | 0.27           | 0.2545  | 0.9561  |
| 23 | 20 | AVP         | 11                   | rs2422840  | 3024384       | G                    | 0.2177                           | 0.0099        | -0.26                | 0.28           | 0.346   | 0.9669  |
| 24 | 12 | AVPR1A      | 4                    | rs1042615  | 61830476      | T                    | 0.4329                           | 1             | 0.34                 | 0.24           | 0.1537  | 0.9436  |
| 25 | 14 | BDKRB2      | 29                   | rs4905459  | 95741884      | A                    | 0.0816                           | 0.6741        | -0.62                | 0.43           | 0.147   | 0.9436  |
| 26 | 2  | BMPR2       | 10                   | rs17199235 | 203128104     | G                    | 0.1235                           | 0.3852        | 0.53                 | 0.36           | 0.1425  | 0.9436  |
| 27 | 5  | CARTPT      | 7                    | rs10515114 | 71049590      | C                    | 0.0991                           | 0.162         | -0.28                | 0.42           | 0.5044  | 0.9766  |
| 28 | 3  | CAV3        | 24                   | rs2268484  | 8748950       | C                    | 0.2769                           | 0.5851        | -0.41                | 0.26           | 0.1164  | 0.9429  |
| 29 | 14 | CMA1        | 6                    | rs10220622 | 24046810      | T                    | 0.0635                           | 0.5962        | -0.64                | 0.62           | 0.3063  | 0.9410  |

|    |    |         |    |            |           |   |        |        |       |      |        |        |
|----|----|---------|----|------------|-----------|---|--------|--------|-------|------|--------|--------|
| 30 | 7  | COL1A2  | 28 | rs369982   | 93886418  | A | 0.4404 | 0.2047 | -0.45 | 0.22 | 0.0443 | 0.9069 |
| 31 | 4  | CORIN   | 59 | rs16860440 | 47298612  | G | 0.0879 | 0.4321 | 0.61  | 0.4  | 0.128  | 0.9436 |
| 32 | 11 | CSRP3   | 11 | rs1346118  | 19176075  | C | 0.166  | 0.2608 | 0.52  | 0.33 | 0.1095 | 0.9389 |
| 33 | 20 | CST3    | 6  | rs911122   | 23573746  | G | 0.4058 | 0.4357 | -0.06 | 0.25 | 0.794  | 0.9859 |
| 34 | 14 | CTSG    | 8  | rs12878759 | 24115524  | G | 0.0391 | 0.1976 | -1.38 | 0.83 | 0.0971 | 0.9310 |
| 35 | 8  | CYP11B1 | 2  | rs5297     | 143952659 | C | 0.083  | 0.6798 | 0.07  | 0.4  | 0.8698 | 0.9874 |
| 36 | 8  | CYP11B2 | 8  | rs11781082 | 143996903 | A | 0.2837 | 0.2186 | 0.48  | 0.25 | 0.048  | 0.9069 |
| 37 | 1  | CYP2J2  | 6  | rs10493270 | 60161262  | A | 0.0864 | 1      | 0.73  | 0.44 | 0.0964 | 0.9374 |
| 38 | 2  | DES     | 7  | rs907684   | 220007516 | C | 0.0366 | 0.6422 | 0.04  | 0.51 | 0.9409 | 0.9879 |
| 39 | 19 | DMPK    | 5  | rs2854300  | 50966232  | G | 0.041  | 0.4094 | -0.73 | 0.58 | 0.2076 | 0.9515 |
| 40 | 11 | DRD2    | 19 | rs11214611 | 112835429 | G | 0.1479 | 0.4578 | 0.23  | 0.34 | 0.4963 | 0.9756 |
| 41 | 3  | DRD3    | 18 | rs3732783  | 115373479 | G | 0.0503 | 0.7385 | -1.53 | 0.54 | 0.0047 | 0.7067 |
| 42 | 1  | ECE1    | 17 | rs213051   | 21494123  | G | 0.3125 | 1      | -0.2  | 0.27 | 0.4579 | 0.9723 |
| 43 | 6  | EDN1    | 27 | rs4714384  | 12405839  | C | 0.306  | 0.1622 | 0.28  | 0.27 | 0.2982 | 0.9605 |
| 44 | 1  | EDN2    | 27 | rs4660541  | 41727031  | T | 0.2669 | 0.3798 | -0.59 | 0.28 | 0.0348 | 0.8875 |
| 45 | 20 | EDN3    | 10 | rs11570248 | 57307333  | G | 0.0855 | 0.6907 | 1.01  | 0.37 | 0.0067 | 0.7461 |
| 46 | 4  | EDNRA   | 17 | rs6822565  | 148656962 | C | 0.2319 | 0.3343 | 0.92  | 0.28 | 0.0012 | 0.5561 |
| 47 | 13 | EDNRB   | 14 | rs3027129  | 77384402  | T | 0.0625 | 0.7916 | -0.78 | 0.45 | 0.0842 | 0.9368 |
| 48 | 2  | EPAS1   | 38 | rs7579899  | 46391108  | A | 0.4062 | 0.6978 | -0.22 | 0.24 | 0.3619 | 0.9679 |
| 49 | 8  | EPHX2   | 12 | rs11780471 | 27400636  | A | 0.0674 | 0.4541 | 0.18  | 0.49 | 0.7144 | 0.9834 |
| 50 | 1  | ACOT11  | 47 | rs11589310 | 54785469  | T | 0.21   | 0.3473 | 0.29  | 0.29 | 0.3291 | 0.9664 |
| 51 | 6  | FOXC1   | 12 | rs2745593  | 1548401   | G | 0.4922 | 0.7546 | -0.02 | 0.24 | 0.9489 | 0.9879 |
| 52 | 16 | FOXC2   | 8  | rs4843165  | 85162542  | T | 0.2696 | 0.9367 | -0.39 | 0.26 | 0.1217 | 0.9436 |
| 53 | 17 | GAA     | 5  | rs12452616 | 75704676  | A | 0.2778 | 0.2425 | -0.15 | 0.26 | 0.5712 | 0.9796 |
| 54 | 14 | GCH1    | 6  | rs4411417  | 54390313  | C | 0.2021 | 0.5608 | -0.05 | 0.3  | 0.8749 | 0.9874 |
| 55 | 1  | GCLM    | 5  | rs7533596  | 94120717  | A | 0.373  | 0.7386 | 0.27  | 0.25 | 0.2822 | 0.9586 |
| 56 | 12 | GNB3    | 9  | rs5439     | 6819143   | C | 0.0911 | 0.4502 | -0.1  | 0.44 | 0.814  | 0.9859 |
| 57 | 3  | GPX1    | 2  | rs1800668  | 49370761  | T | 0.3047 | 0.4171 | 0.26  | 0.25 | 0.3037 | 0.9634 |
| 58 | 11 | HBB     | 6  | rs11036351 | 5202576   | T | 0.4604 | 0.2849 | 0.67  | 0.24 | 0.0049 | 0.7067 |
| 59 | 5  | HBEGF   | 8  | rs1042184  | 139706145 | T | 0.0745 | 0.258  | -0.43 | 0.41 | 0.2915 | 0.9602 |
| 60 | 15 | HCN4    | 16 | rs7172808  | 71450685  | G | 0.1611 | 0.729  | 0.52  | 0.34 | 0.1237 | 0.9436 |
| 61 | 22 | HMOX1   | 15 | rs17883419 | 34121971  | T | 0.044  | 1      | -0.69 | 0.55 | 0.208  | 0.9515 |
| 62 | 1  | ADORA3  | 35 | rs2789535  | 111884087 | G | 0.4854 | 1      | -0.08 | 0.25 | 0.7562 | 0.9846 |
| 63 | 16 | HSD11B2 | 2  | rs6499129  | 66015752  | C | 0.0991 | 0.0344 | 0.68  | 0.42 | 0.1066 | 0.9374 |
| 64 | 1  | HSPB7   | 6  | rs1056207  | 16217414  | T | 0.0883 | 0.6928 | 0.55  | 0.44 | 0.2066 | 0.9515 |

|    |    |        |     |            |           |   |        |        |       |      |                      |        |
|----|----|--------|-----|------------|-----------|---|--------|--------|-------|------|----------------------|--------|
| 65 | 12 | IGF1   | 34  | rs17882264 | 101395486 | G | 0.0894 | 0.0524 | -0.46 | 0.37 | 0.2196               | 0.9520 |
| 66 | 21 | KCNE1  | 28  | rs1892593  | 34748230  | A | 0.3213 | 0.1516 | -0.1  | 0.24 | 0.6963               | 0.9826 |
| 67 | 21 | KCNE2  | 11  | rs12626687 | 34655160  | A | 0.3047 | 0.5557 | -0.59 | 0.25 | 0.0211               | 0.8460 |
| 68 | 7  | KCNH2  | 11  | rs3807373  | 150299654 | T | 0.2988 | 0.3709 | 0.29  | 0.26 | 0.2751               | 0.9581 |
| 69 | 12 | KCNJ8  | 2   | rs829064   | 21831775  | G | 0.167  | 0.7363 | 0.11  | 0.32 | 0.7343               | 0.9836 |
| 70 | 11 | KCNQ1  | 195 | rs2283210  | 2704481   | G | 0.0225 | 0.4039 | -2.55 | 0.73 | 0.0005               | 0.5210 |
| 71 | 3  | KNG1   | 23  | rs1392952  | 187913716 | T | 0.1245 | 1      | -0.22 | 0.37 | 0.5551               | 0.9790 |
| 72 | 3  | MYL3   | 6   | rs6768627  | 46870380  | T | 0.0669 | 1      | 0.73  | 0.48 | 0.1251               | 0.9436 |
| 73 | 3  | NISCH  | 10  | rs17263770 | 52494894  | C | 0.1294 | 0.4063 | 0.59  | 0.36 | 0.1071               | 0.9378 |
| 74 | 17 | NOS2A  | 67  | rs8081248  | 23106091  | A | 0.4455 | 0.4471 | -0.26 | 0.25 | 0.2965               | 0.9602 |
| 75 | 7  | NOS3   | 26  | rs2853796  | 150334848 | G | 0.4692 | 0.802  | -0.32 | 0.23 | 0.1611               | 0.9461 |
| 76 | 1  | NPPA   | 10  | rs198372   | 11832101  | A | 0.1309 | 0.4093 | -1.19 | 0.33 | 0.0003               | 0.4853 |
| 77 | 1  | NPPB   | 11  | rs11801879 | 11851406  | C | 0.0898 | 0.5639 | -1.8  | 0.4  | 7.7×10 <sup>-6</sup> | 0.0856 |
| 78 | 2  | NPPC   | 14  | rs11679292 | 232507906 | T | 0.0195 | 1      | -1.78 | 0.64 | 0.0053               | 0.7067 |
| 79 | 1  | NPR1   | 6   | rs7543790  | 151936937 | T | 0.0567 | 0.3694 | 0.93  | 0.55 | 0.0883               | 0.9374 |
| 80 | 9  | NPR2   | 6   | rs1407295  | 35795161  | A | 0.0836 | 0.8378 | 0.88  | 0.46 | 0.055                | 0.9240 |
| 81 | 5  | NPR3   | 22  | rs1421811  | 32750027  | C | 0.4007 | 0.1033 | -0.37 | 0.24 | 0.1144               | 0.9421 |
| 82 | 7  | NPY    | 8   | rs16135    | 24294445  | T | 0.0742 | 0.2563 | 0.1   | 0.47 | 0.8279               | 0.9861 |
| 83 | 4  | NPY1R  | 6   | rs12510421 | 164469886 | C | 0.104  | 0.0021 | 0.39  | 0.39 | 0.3188               | 0.9664 |
| 84 | 4  | NPY2R  | 7   | rs10213571 | 156346015 | C | 0.391  | 0.2645 | -0.53 | 0.24 | 0.024                | 0.8558 |
| 85 | 12 | P2RX4  | 5   | rs7961979  | 120155644 | A | 0.1338 | 0.6851 | -0.21 | 0.35 | 0.551                | 0.9790 |
| 86 | 9  | PCSK5  | 156 | rs1538843  | 77791088  | G | 0.0758 | 0.508  | -0.79 | 0.39 | 0.042                | 0.9066 |
| 87 | 6  | PLN    | 3   | rs9481825  | 118982785 | A | 0.1672 | 0.3129 | 0.8   | 0.31 | 0.0099               | 0.7607 |
| 88 | 2  | POMC   | 9   | rs6545975  | 25238989  | C | 0.4053 | 0.3993 | -0.26 | 0.23 | 0.2577               | 0.9574 |
| 89 | 3  | PPARG  | 59  | rs4684846  | 12313849  | G | 0.249  | 0.6763 | -0.72 | 0.28 | 0.009                | 0.7557 |
| 90 | 9  | PTGS1  | 20  | rs10306108 | 124171301 | C | 0.0654 | 1      | 1.04  | 0.44 | 0.019                | 0.8330 |
| 91 | 1  | PTGS2  | 24  | rs4648310  | 184907148 | G | 0.0273 | 0.0363 | -2.26 | 0.5  | 5.9×10 <sup>-6</sup> | 0.0815 |
| 92 | 1  | REN    | 28  | rs11571084 | 202395455 | A | 0.0411 | 1      | 0.71  | 0.58 | 0.2253               | 0.9540 |
| 93 | 3  | SCN5A  | 43  | rs6797133  | 38631037  | A | 0.3916 | 1      | 0.34  | 0.23 | 0.1352               | 0.9436 |
| 94 | 7  | SEMA3C | 2   | rs17154557 | 80323912  | A | 0.0562 | 0.1273 | 0.27  | 0.58 | 0.6382               | 0.9814 |
| 95 | 21 | SOD1   | 4   | rs9974610  | 31940240  | G | 0.1763 | 0.1313 | 0     | 0.33 | 0.9943               | 0.9880 |
| 96 | 6  | SOD2   | 21  | rs2758352  | 160042911 | A | 0.2312 | 0.6609 | 0.66  | 0.28 | 0.018                | 0.8265 |
| 97 | 7  | SRI    | 8   | rs4728737  | 87677464  | G | 0.0508 | 1      | 0.81  | 0.57 | 0.1613               | 0.9461 |
| 98 | 19 | TBXA2R | 8   | rs8105780  | 3543171   | T | 0.3495 | 0.4095 | 0.29  | 0.26 | 0.2696               | 0.9579 |
| 99 | 1  | TGFB2  | 25  | rs17047682 | 216589648 | G | 0.0674 | 1      | 0.85  | 0.47 | 0.0704               | 0.9327 |

|     |    |       |    |           |           |   |        |        |       |      |        |        |
|-----|----|-------|----|-----------|-----------|---|--------|--------|-------|------|--------|--------|
| 100 | 11 | TH    | 6  | rs6356    | 2147527   | A | 0.3594 | 0.3775 | 0.18  | 0.25 | 0.4677 | 0.9742 |
| 101 | 19 | TNNI3 | 9  | rs3729838 | 60360122  | C | 0.1799 | 0.9156 | 0.29  | 0.32 | 0.3626 | 0.9679 |
| 102 | 1  | TNNT2 | 13 | rs2799691 | 199614966 | C | 0.2544 | 0.0699 | 0.17  | 0.26 | 0.525  | 0.9786 |
| 103 | 15 | TPM1  | 10 | rs4075583 | 61127280  | G | 0.3465 | 0.0532 | 0.34  | 0.23 | 0.1463 | 0.9436 |
| 104 | 1  | UTS2  | 12 | rs707476  | 7840693   | T | 0.3105 | 0.1257 | -0.55 | 0.25 | 0.0296 | 0.8802 |
| 105 | 7  | WNT2  | 11 | rs39310   | 116739977 | C | 0.2681 | 0.233  | -0.23 | 0.27 | 0.3822 | 0.9692 |

Ch – chromosome, top SNP – single nucleotide polymorphism in a given gene with the most significant association with mean 24-hour SBP, bp – base pair, HWE - statistical significance of Hardy-Weinberg equilibrium test,  $\beta$ -coefficient - estimated quantitative effect of each SNP minor (coded) allele copy on mean 24-hour DBP (adjusted for age, age<sup>2</sup>, sex and BP-lowering medication), P-value –statistical significance, q-value – false positive discovery rate



**Table S12.** Analysis of SNPs identified in meta-analysis of genome-wide association studies and present on the 50K IBC array in relation to mean 24-hour BP in the GRAPHIC Study.

| Chr | locus    | GWAS leading SNP | Ref | GRAPHIC SNP | r <sup>2</sup> | mean 24-hour SBP   |         | mean 24-hour DBP   |                      |
|-----|----------|------------------|-----|-------------|----------------|--------------------|---------|--------------------|----------------------|
|     |          |                  |     |             |                | β-coefficient (SE) | P-value | β-coefficient (SE) | P-value              |
| 1   | MTHFR    | rs17367504       | 1   | rs17367504  | 1              | -1.67 (0.46)       | 0.0003  | -1.25 (0.29)       | 1.8x10 <sup>-5</sup> |
| 12  | ATP2B1   | rs111105354      | 2   | rs111105354 | 1              | -0.26 (0.48)       | 0.5797  | -0.18 (0.34)       | 0.6012               |
| 12  | SH2B3    | rs3184504        | 2   | rs3184504   | 1              | 0.88 (0.36)        | 0.0149  | 0.78 (0.24)        | 0.0013               |
| 12  | C12orf30 | rs17696736       | 2   | rs17696736  | 1              | 0.48 (0.37)        | 0.1931  | 0.48 (0.24)        | 0.0471               |
| 15  | CSK      | rs1378942        | 1   | rs2472304   | 0.96           | 0.33 (0.37)        | 0.3758  | 0.12 (0.25)        | 0.6292               |

Ch – chromosome, GWAS – genome-wide association scan, SNP – single nucleotide polymorphism, r<sup>2</sup> – linkage disequilibrium measure between a variant identified in GWAS and the SNP genotyped in the GRAPHIC, SBP – systolic blood pressure, DBP – diastolic blood pressure, β-coefficient – estimated quantitative effect of each SNP minor allele copy on mean 24-hour BP (adjusted for age, age<sup>2</sup>, sex and BP-lowering medication), SE – standard error, P-value – statistical significance, Ref 1 – Nat Genet. 2009;44:666-676, Ref 2 – Nat Genet. 2009;41:677-687

**Table S13.** Gene ontology biological processes associated with mean 24-hour BP in the GRAPHIC Study - Gene set-based analysis of polymorphisms (GeSBAP).

| GO symbol  | GO biological process            | mean 24-hour SBP – FDR | mean 24-hour DBP – FDR |
|------------|----------------------------------|------------------------|------------------------|
| GO:0007243 | protein kinase cascade           | 0.0467                 | 0.0405                 |
| GO:0042127 | regulation of cell proliferation | 0.0467                 | 0.0423                 |
| GO:0006915 | apoptosis                        | NS                     | 0.0072                 |
| GO:0042981 | regulation of apoptosis          | NS                     | 0.0072                 |
| GO:0008219 | cell death                       | NS                     | 0.0312                 |

GO – gene ontology; FDR – statistical significance after correction for multiple testing, NS – non-significant

**Table S14.** Distribution of SNPs nominally associated with mean 24-hour BP at P<0.01 according to their characteristic and frequency - sensitivity analysis.

| Descriptor                         | Illumina gene-centric array | SNPs associated with mean 24-hour SBP at p<0.01 | p-value | SNPs associated with mean 24-hour DBP at p<0.01 | P-value              |
|------------------------------------|-----------------------------|-------------------------------------------------|---------|-------------------------------------------------|----------------------|
| All SNPs                           | 33,577                      | 443                                             | -       | 424                                             | -                    |
| Exonic SNPs                        | 2,298 (6.8%)                | 31 (7%)                                         | 0.8490  | 40 (9.4%)                                       | 0.0420               |
| Non-synonymous SNPs                | 1,634 (4.9%)                | 23 (5.2%)                                       | 0.7383  | 28 (6.6%)                                       | 0.1110               |
| All SNPs with MAF<0.05             | 4,355 (13.0%)               | 79 (17.8%)                                      | 0.0035  | 84 (19.8%)                                      | 8.0x10 <sup>-5</sup> |
| Exonic SNPs with MAF<0.05 *        | 516 (11.8%)                 | 7 (8.9%)                                        | 0.4857  | 10 (11.9%)                                      | 1.0                  |
| Non-synonymous SNPs with MAF<0.05* | 406 (9.3%)                  | 6 (7.6%)                                        | 0.8440  | 9 (10.7%)                                       | 0.5745               |
| All SNPs with MAF<0.02             | 1,188 (3.5%)                | 32 (7.2%)                                       | 0.0002  | 39 (9.2%)                                       | 1.1x10 <sup>-7</sup> |
| Exonic SNPs with MAF<0.02†         | 162 (13.6%)                 | 0                                               | -       | 6 (15.4%)                                       | 0.8117               |
| Non-synonymous SNPs with MAF<0.02† | 128 (10.8%)                 | 0                                               | -       | 5 (12.8%)                                       | 0.6040               |

MAF – minor allele frequency, \* percentage calculated in relation to total number of SNPs with MAF<0.05, † percentage calculated in relation to total number of SNPs with MAF<0.02

**Figure S1.** SNPs and mean 24-hour SBP and DBP in the GRAPHIC Study – distribution of nominal P-values from generalised estimating equations-based analysis across autosomes.

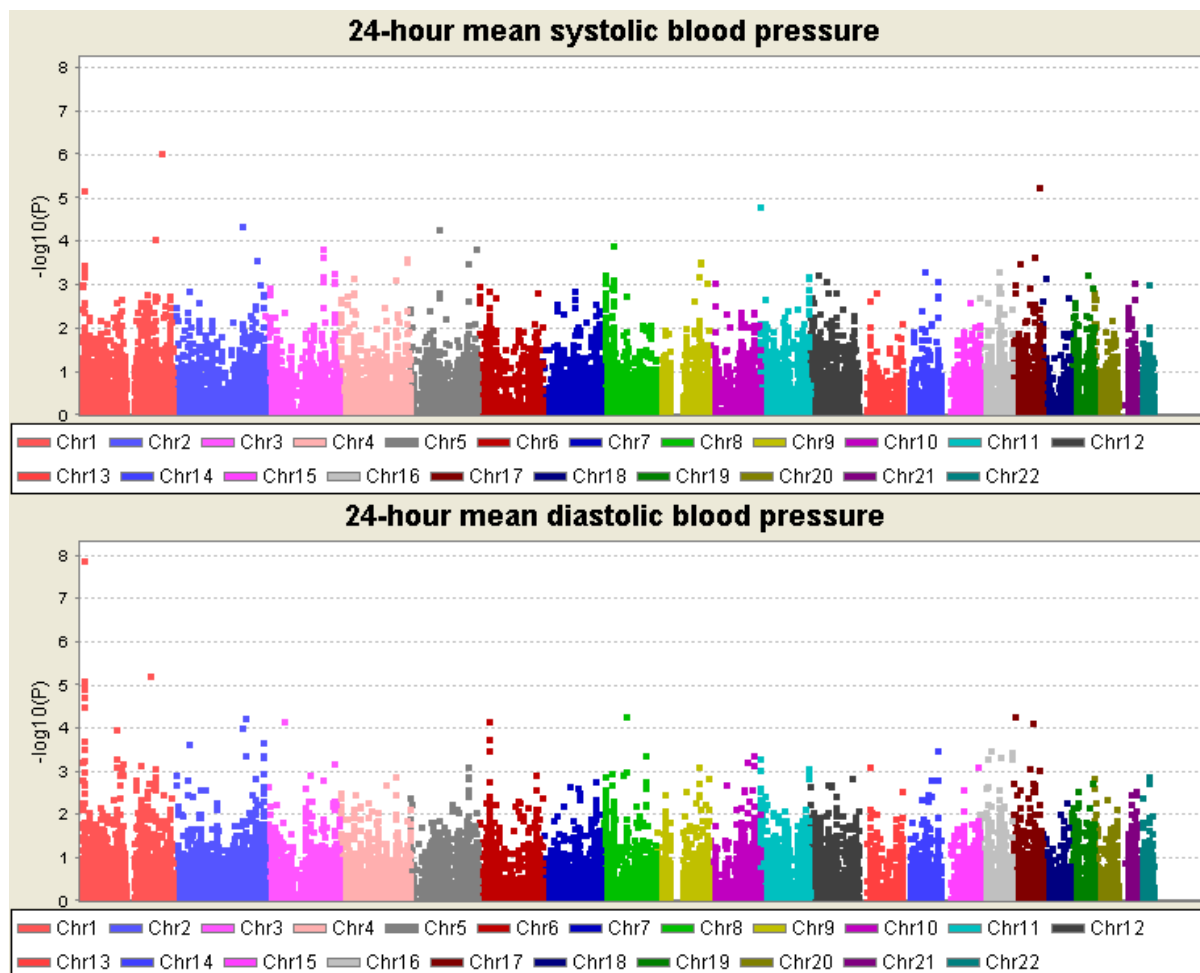

**Figure S2. Power to detect associations with mean 24-hour SBP and DBP in the GRAPHIC study.**

The upper panel shows the power estimates for mean 24-hour SBP to detect nominal associations (left side) and after Bonferroni correction (right side). The lower panel shows the same estimates for mean 24-hour DBP. In each case, lines represent power to detect a per allele effect of 0.5mm (orange), 1mm (green), 1.5mm (red), 2mm (purple) and 3mm (blue).

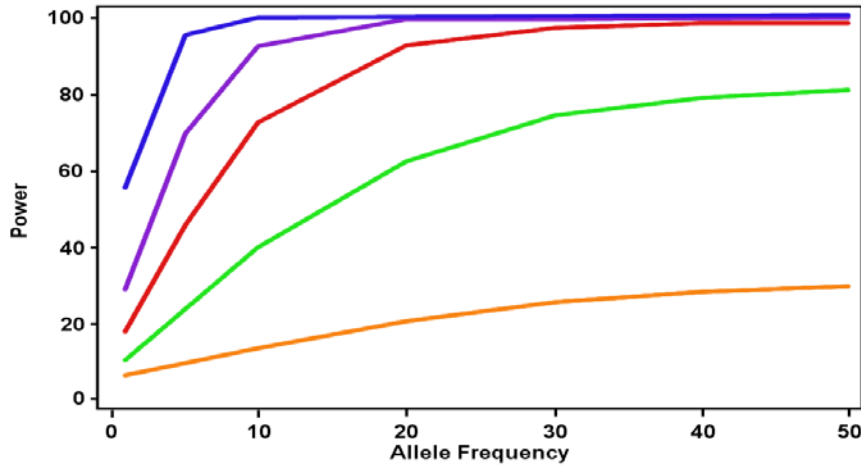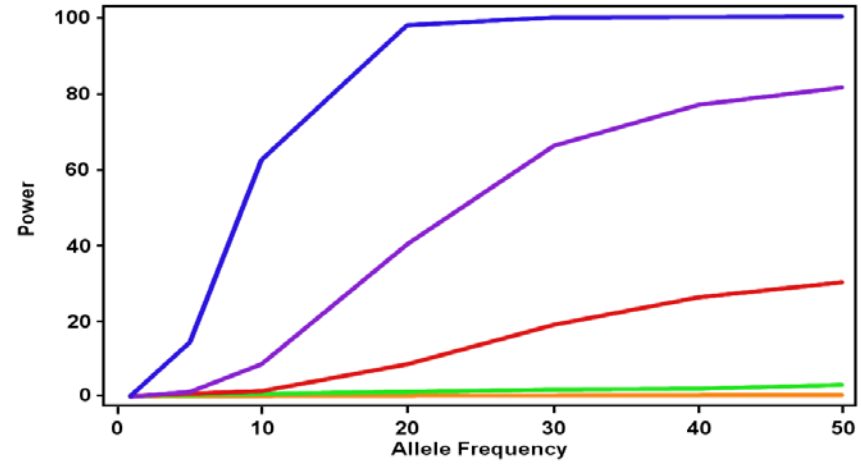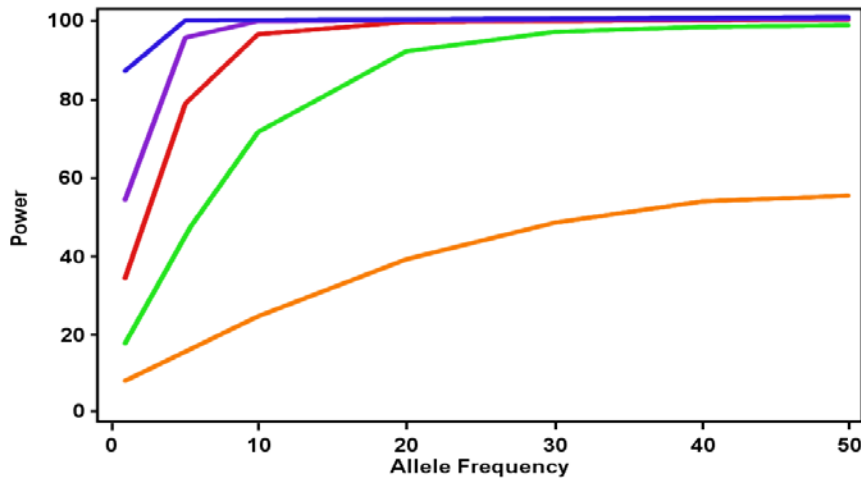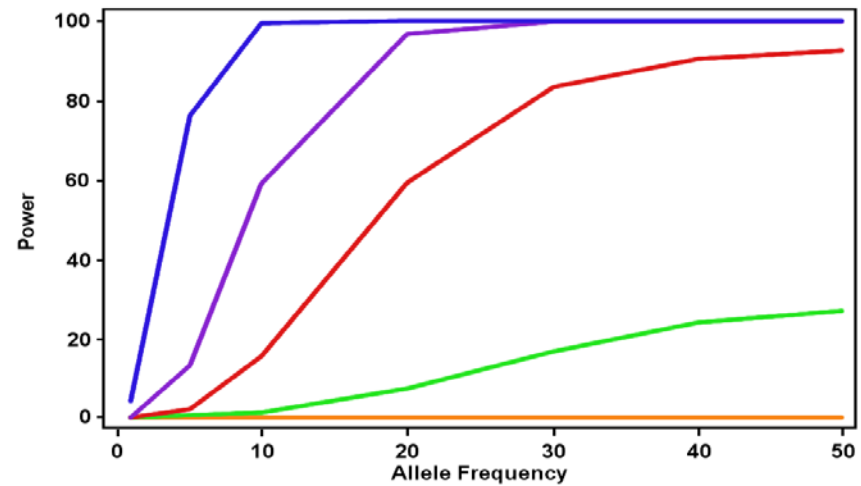

**Figure S3. Linkage disequilibrium of all HapMap SNPs in proximity of 500 Kb to rs13306560.**

rs13306560 is in significant LD with rs13306567 ( $r^2 > 0.8$ ). Other SNPs are shown as pink diamonds. The locations of known genes in the region are shown in green and the recombination hotspots are represented as blue peaks.

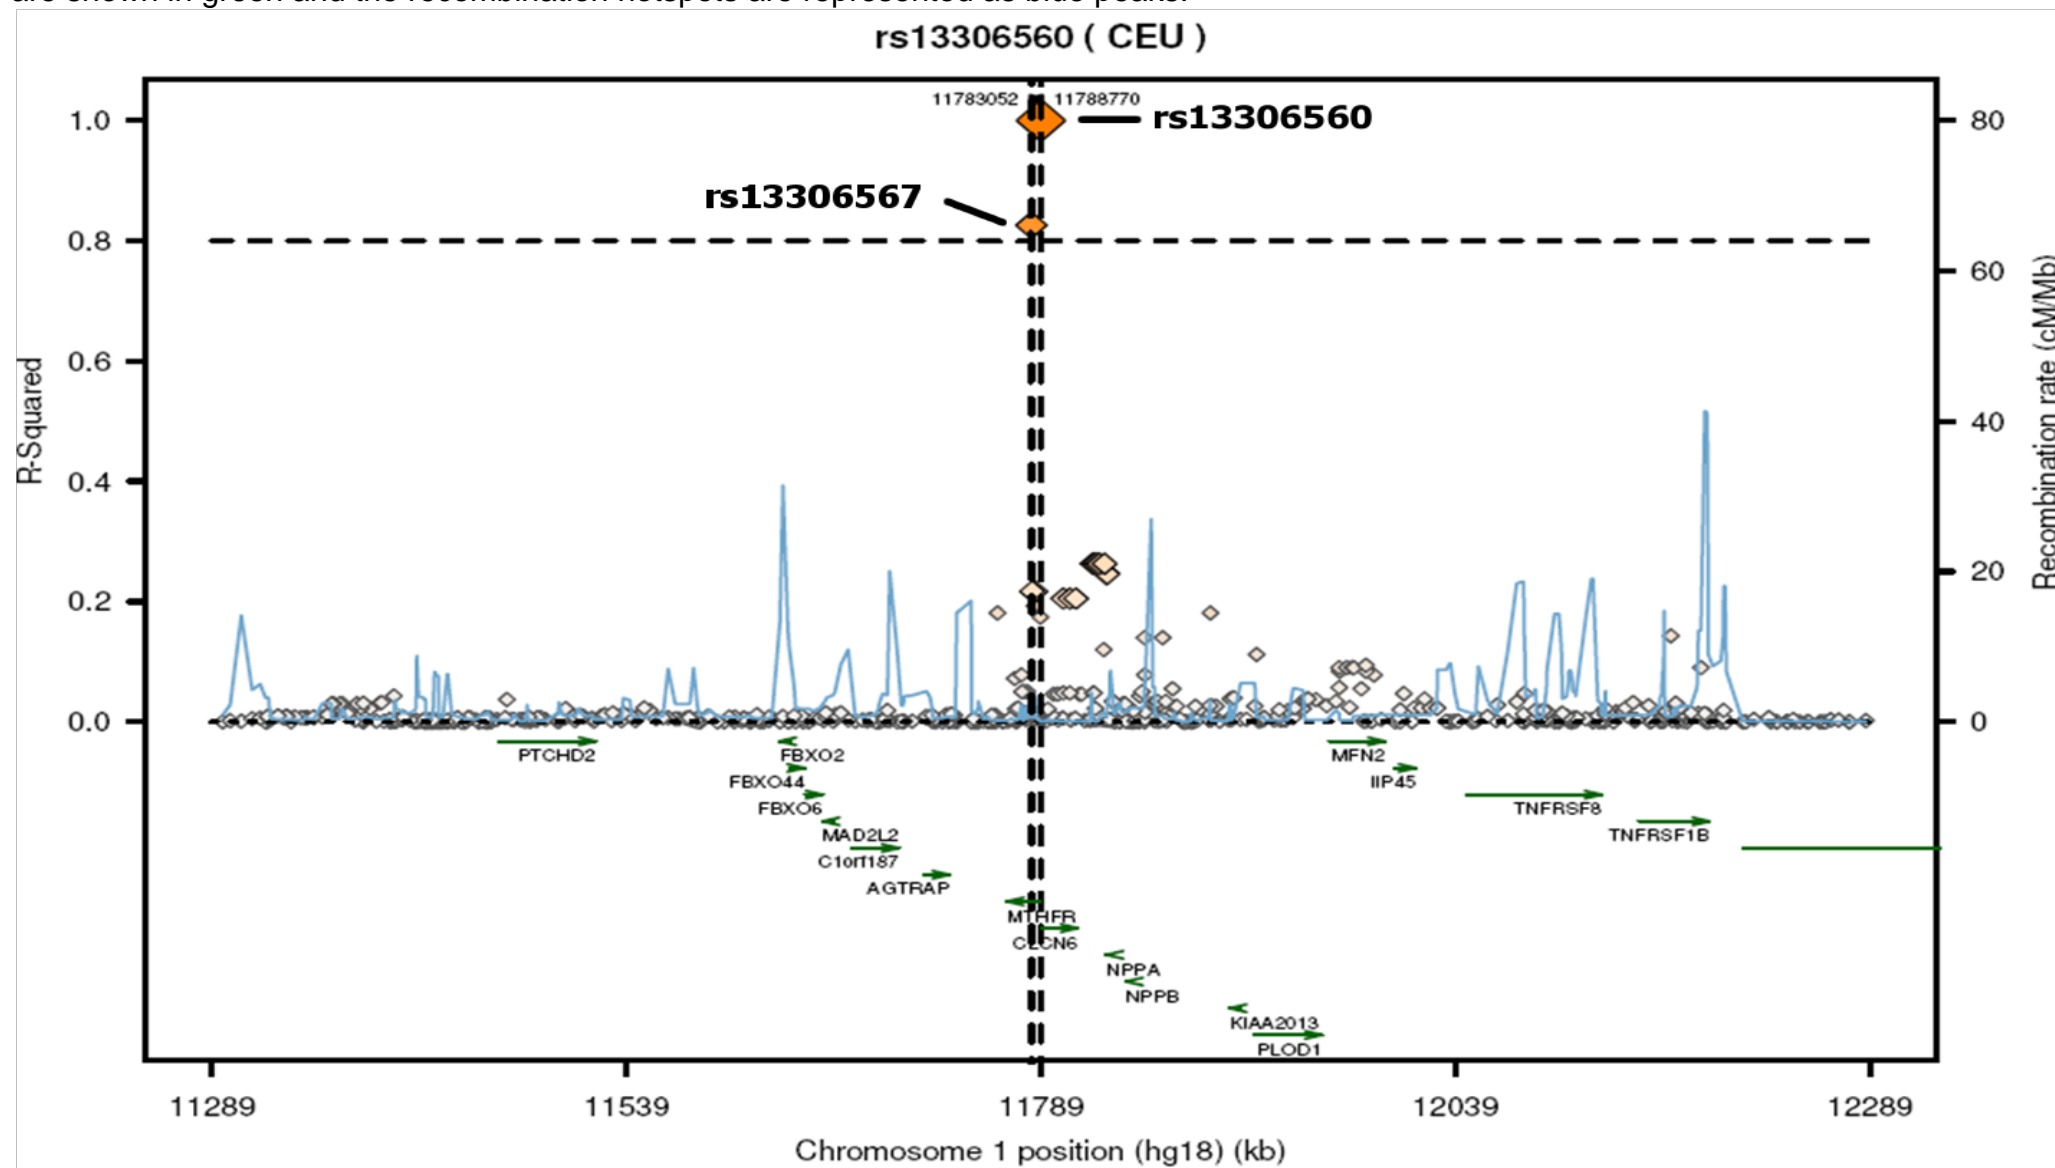



### Figure S4. MTHFR/CLCN6 5'flanking region in UCSC Genome Browser

rs13306560 is the only confirmed polymorphism (arrow) within intergenic junction of MTHFR and CLCN6 (shown on reverse strand). This 5'flanking segment shows a high GC content (64.4%) and is a part of the larger 1104-bp CpG island (highlighted in light green) spanning the promoter regions of both genes. The region lies within 6 rat quantitative trait loci (QTLs) for BP (blood pressure QTLs 7,103,131,139,147 and 155) (highlighted in lapis) and 1 QTL (Athsq1) for atherosclerosis in mouse (highlighted in orange). It exhibits significant conservation across placental mammals (average PhastCons estimate of 0.51) and scores high in evolutionary and sequence pattern extraction through reduced representations (ESPERR) programme (shown in light blue as 7xReg Potential).

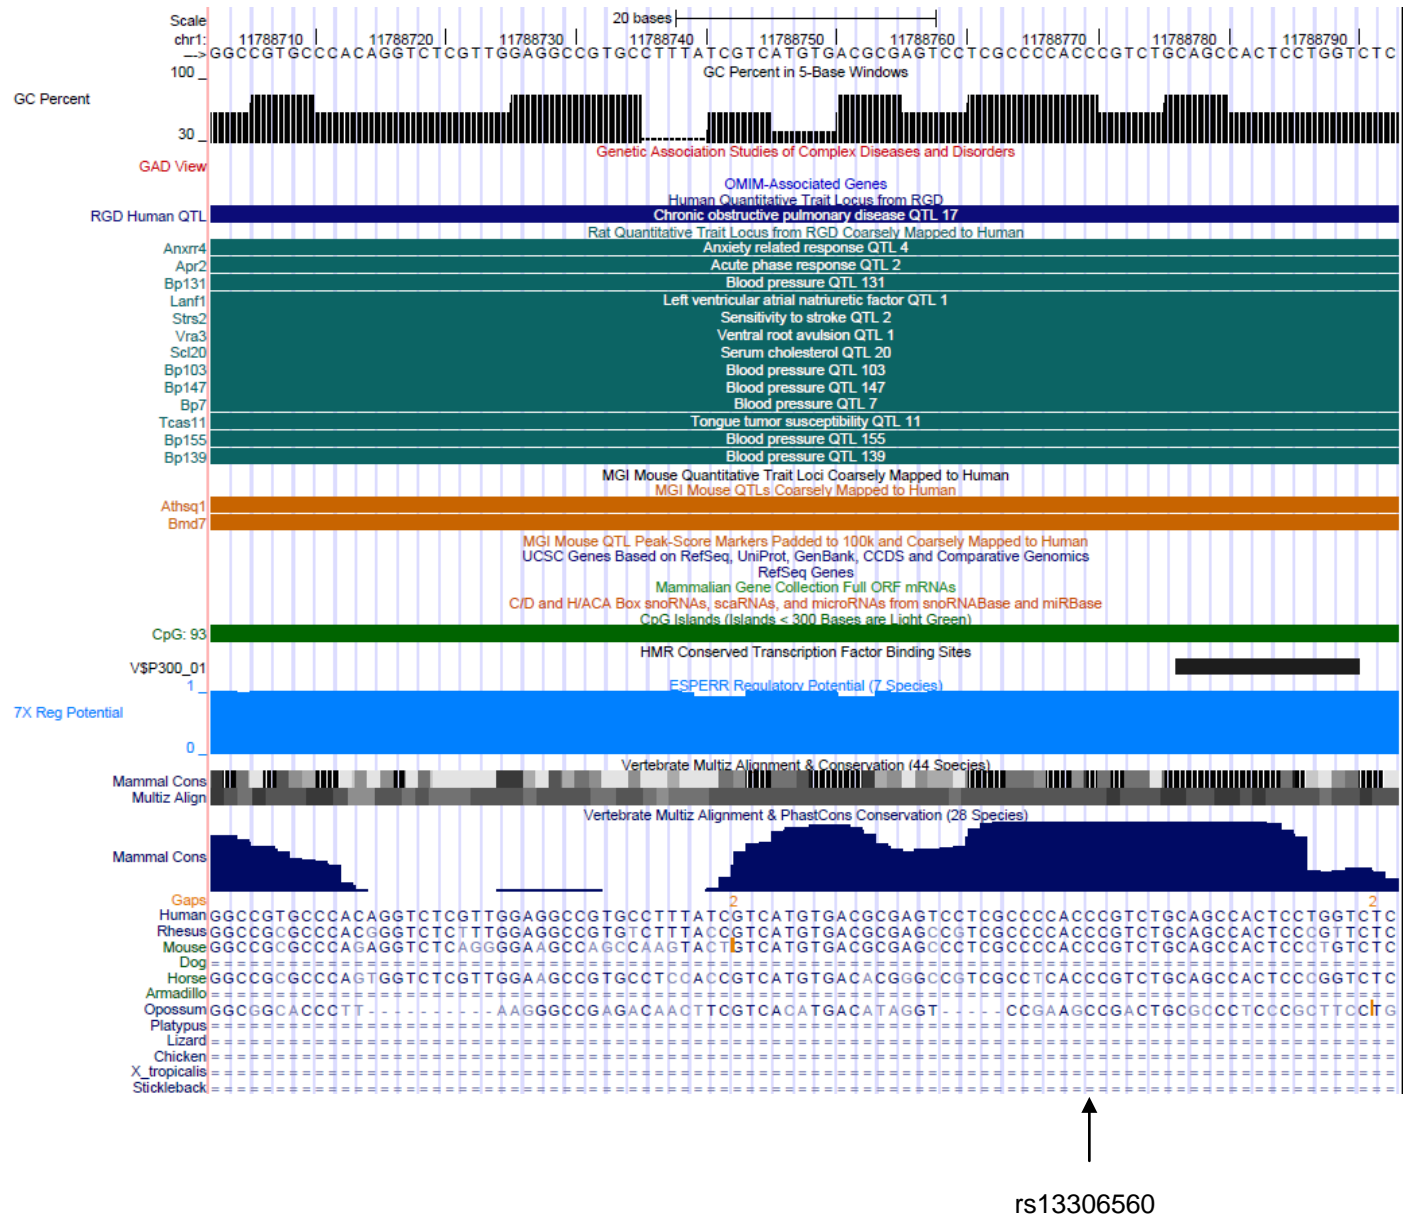

Supplement: NIHMS252937-supplement-Supp1.pdf [file NIHMS252937-supplement-Supp1.pdf]
